# Supplementary material
Source: PubMed Central journal article supplement (PMC3985808)

# Two-Phase Synthesis of (-)-Taxuyunnanine D

Nathan C. Wilde,<sup>+</sup> Minetaka Isomura,<sup>+</sup> Abraham Mendoza, Phil S. Baran<sup>\*</sup>

*Department of Chemistry, The Scripps Research Institute,*

*10550 N. Torrey Pines Rd, La Jolla, CA 92037*

## SUPPORTING INFORMATION

### Part 2: NMR Spectra of Synthesized Compounds

#### Table of Contents

|             |                           |      |     |
|-------------|---------------------------|------|-----|
| Compound 4  | <sup>1</sup> H NMR .....  | page | S3  |
|             | <sup>13</sup> C NMR ..... | page | S4  |
| Compound 5  | <sup>1</sup> H NMR .....  | page | S5  |
|             | <sup>13</sup> C NMR ..... | page | S6  |
| Compound 10 | <sup>1</sup> H NMR .....  | page | S7  |
|             | <sup>13</sup> C NMR ..... | page | S8  |
| Compound 11 | <sup>1</sup> H NMR .....  | page | S9  |
|             | <sup>13</sup> C NMR ..... | page | S10 |
|             | COSY NMR .....            | page | S11 |
|             | NOESY NMR .....           | page | S12 |
| Compound 12 | <sup>1</sup> H NMR .....  | page | S13 |
|             | <sup>13</sup> C NMR ..... | page | S14 |
| Compound 3  | <sup>1</sup> H NMR .....  | page | S15 |
|             | <sup>13</sup> C NMR ..... | page | S16 |
| Compound 7  | <sup>1</sup> H NMR .....  | page | S17 |
|             | <sup>13</sup> C NMR ..... | page | S18 |
| Compound 8  | <sup>1</sup> H NMR .....  | page | S19 |
|             | <sup>13</sup> C NMR ..... | page | S20 |
| Compound S1 | <sup>1</sup> H NMR .....  | page | S21 |
|             | <sup>13</sup> C NMR ..... | page | S22 |
| Compound 6  | <sup>1</sup> H NMR .....  | page | S23 |
|             | <sup>13</sup> C NMR ..... | page | S24 |

|                                                  |      |     |
|--------------------------------------------------|------|-----|
| Compound <b>18</b> $^1\text{H}$ NMR (crude)..... | page | S25 |
| Compound <b>19</b> $^1\text{H}$ NMR (crude)..... | page | S26 |

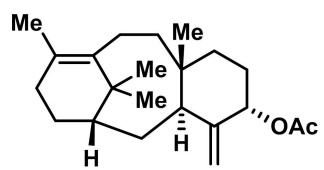

$^1\text{H NMR}$  (400 MHz,  $\text{CDCl}_3$ )

Compound 4

S3

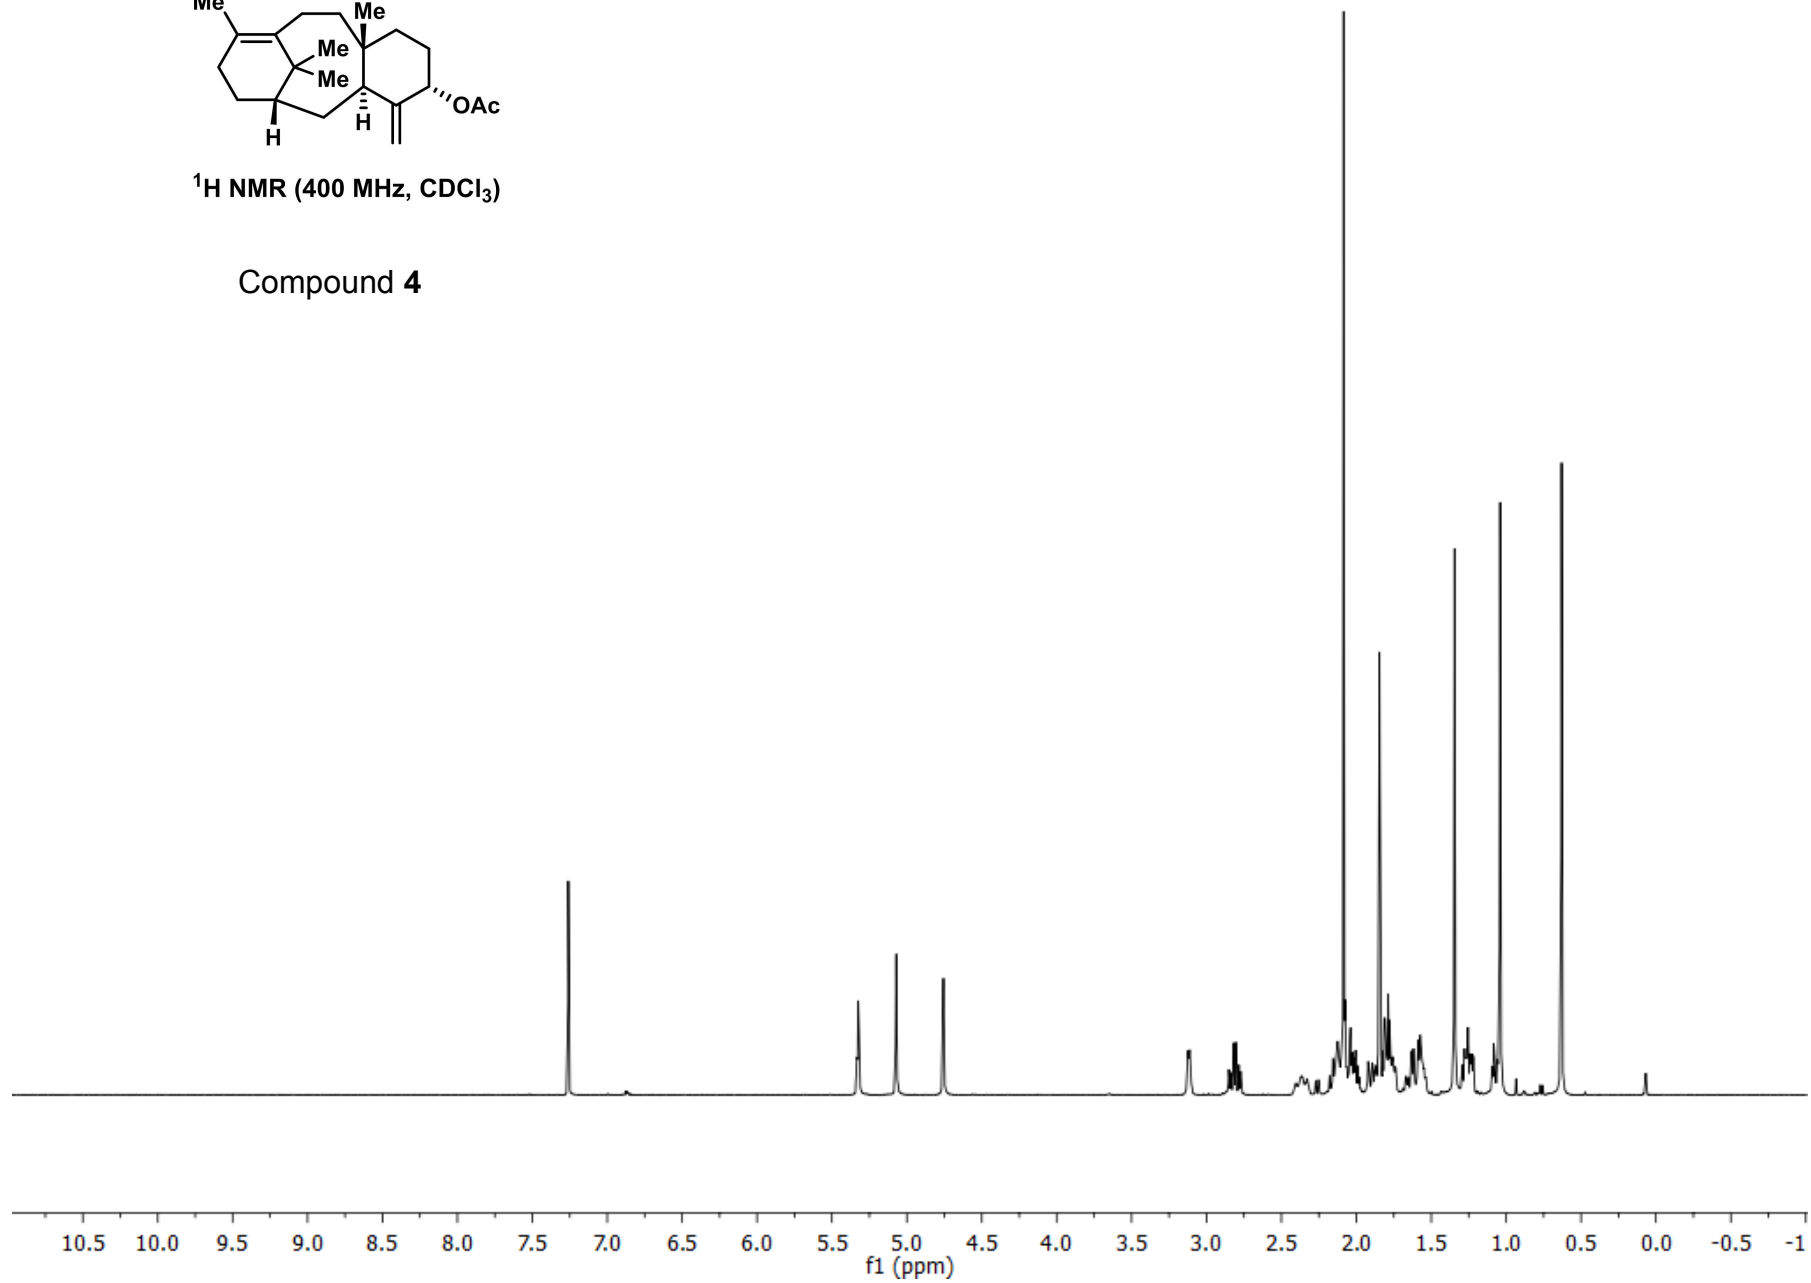

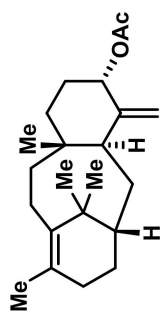

$^{13}\text{C}$  NMR (151 MHz,  $\text{CDCl}_3$ )

Compound 4

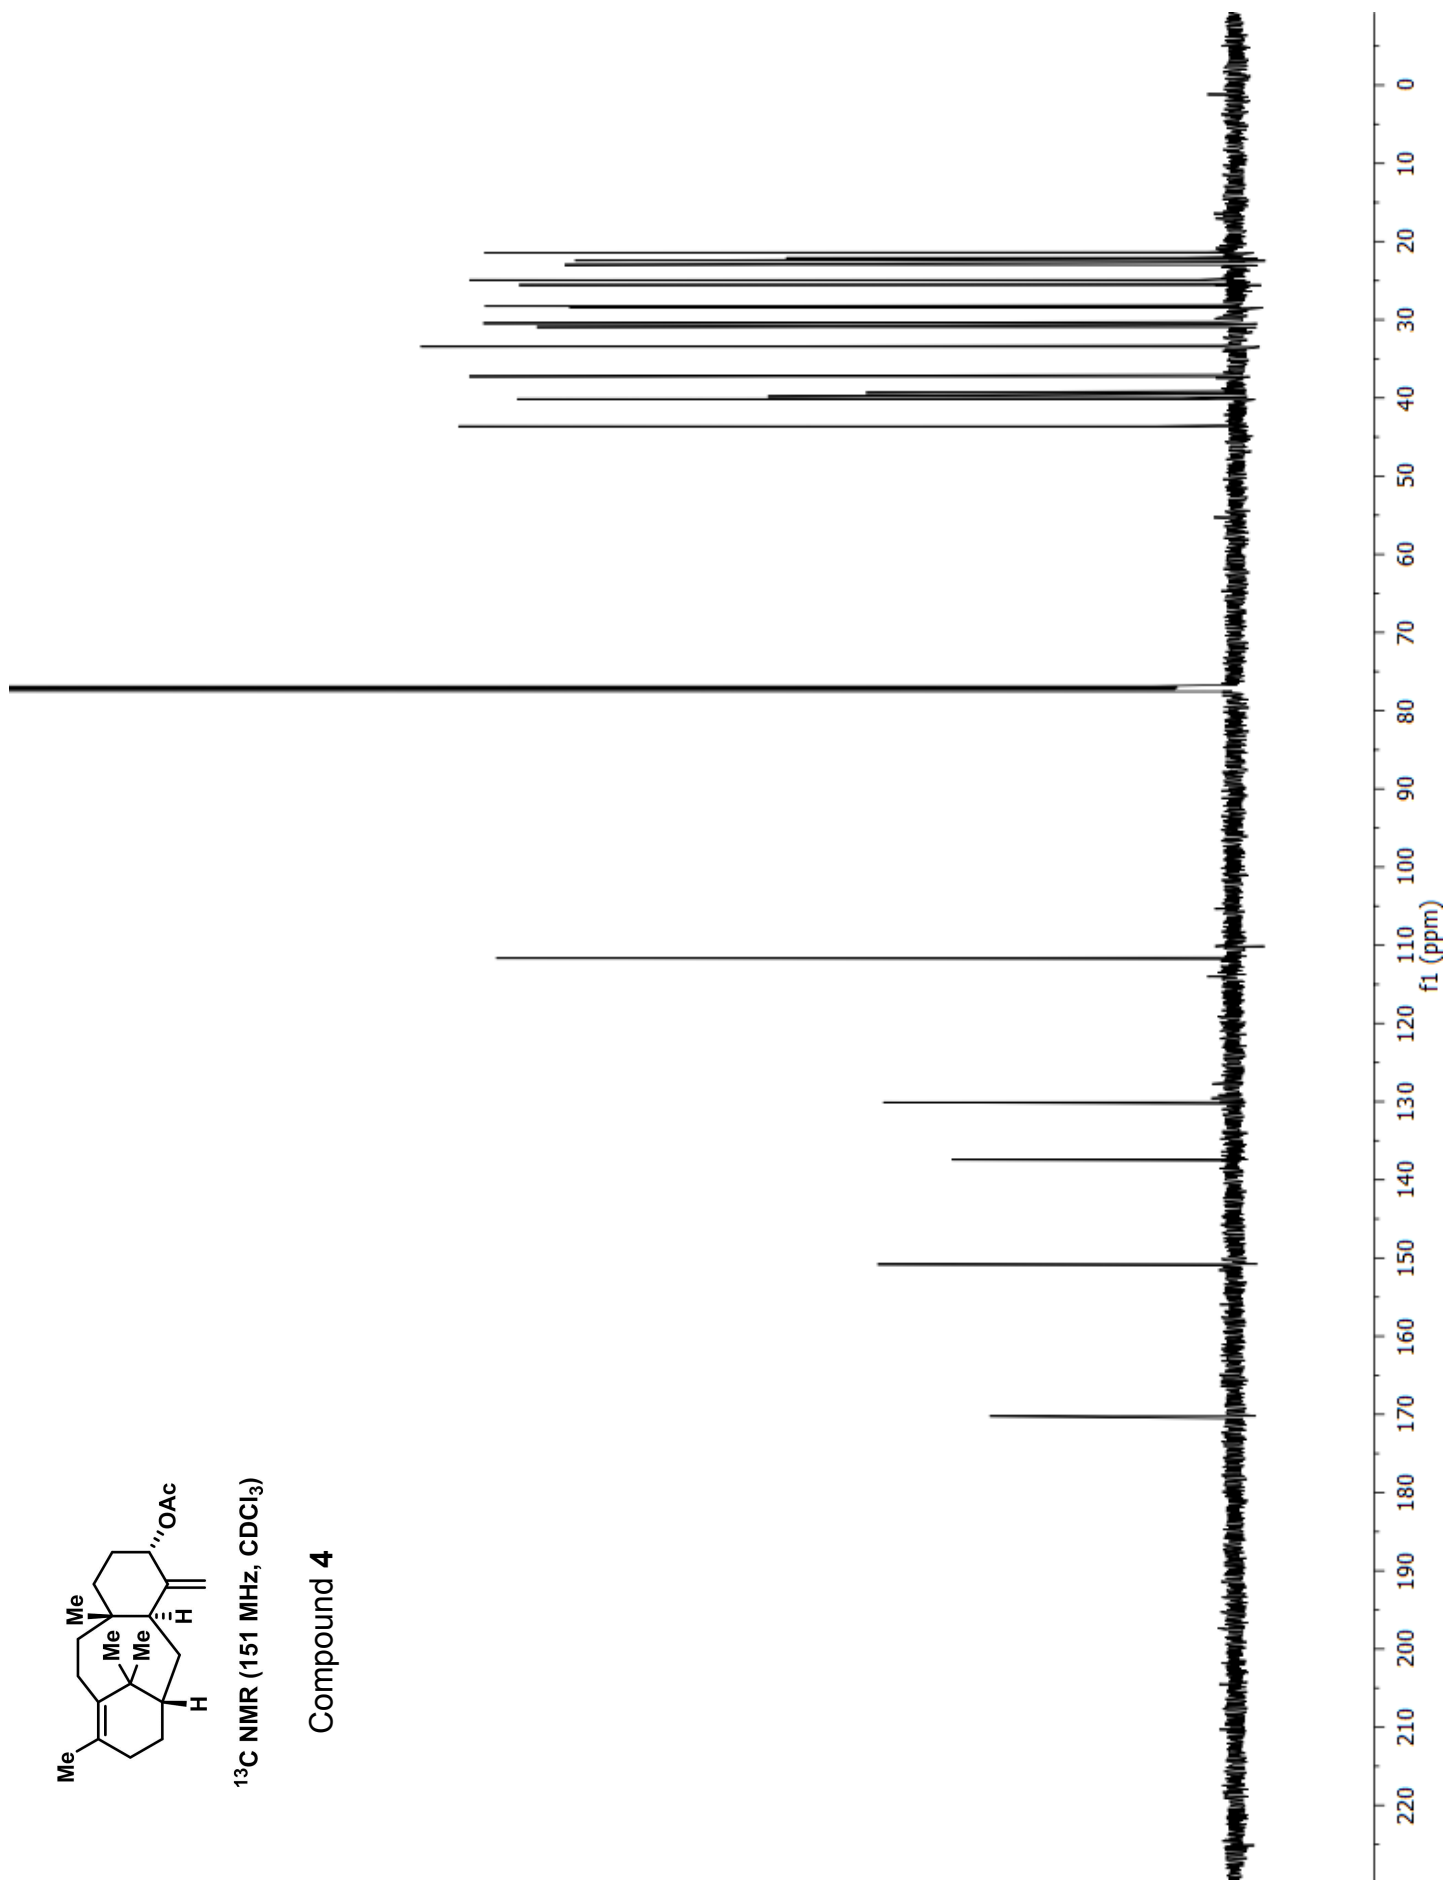

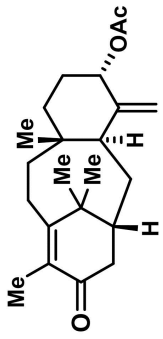

<sup>1</sup>H NMR (600 MHz, CDCl<sub>3</sub>)

Compound **5**

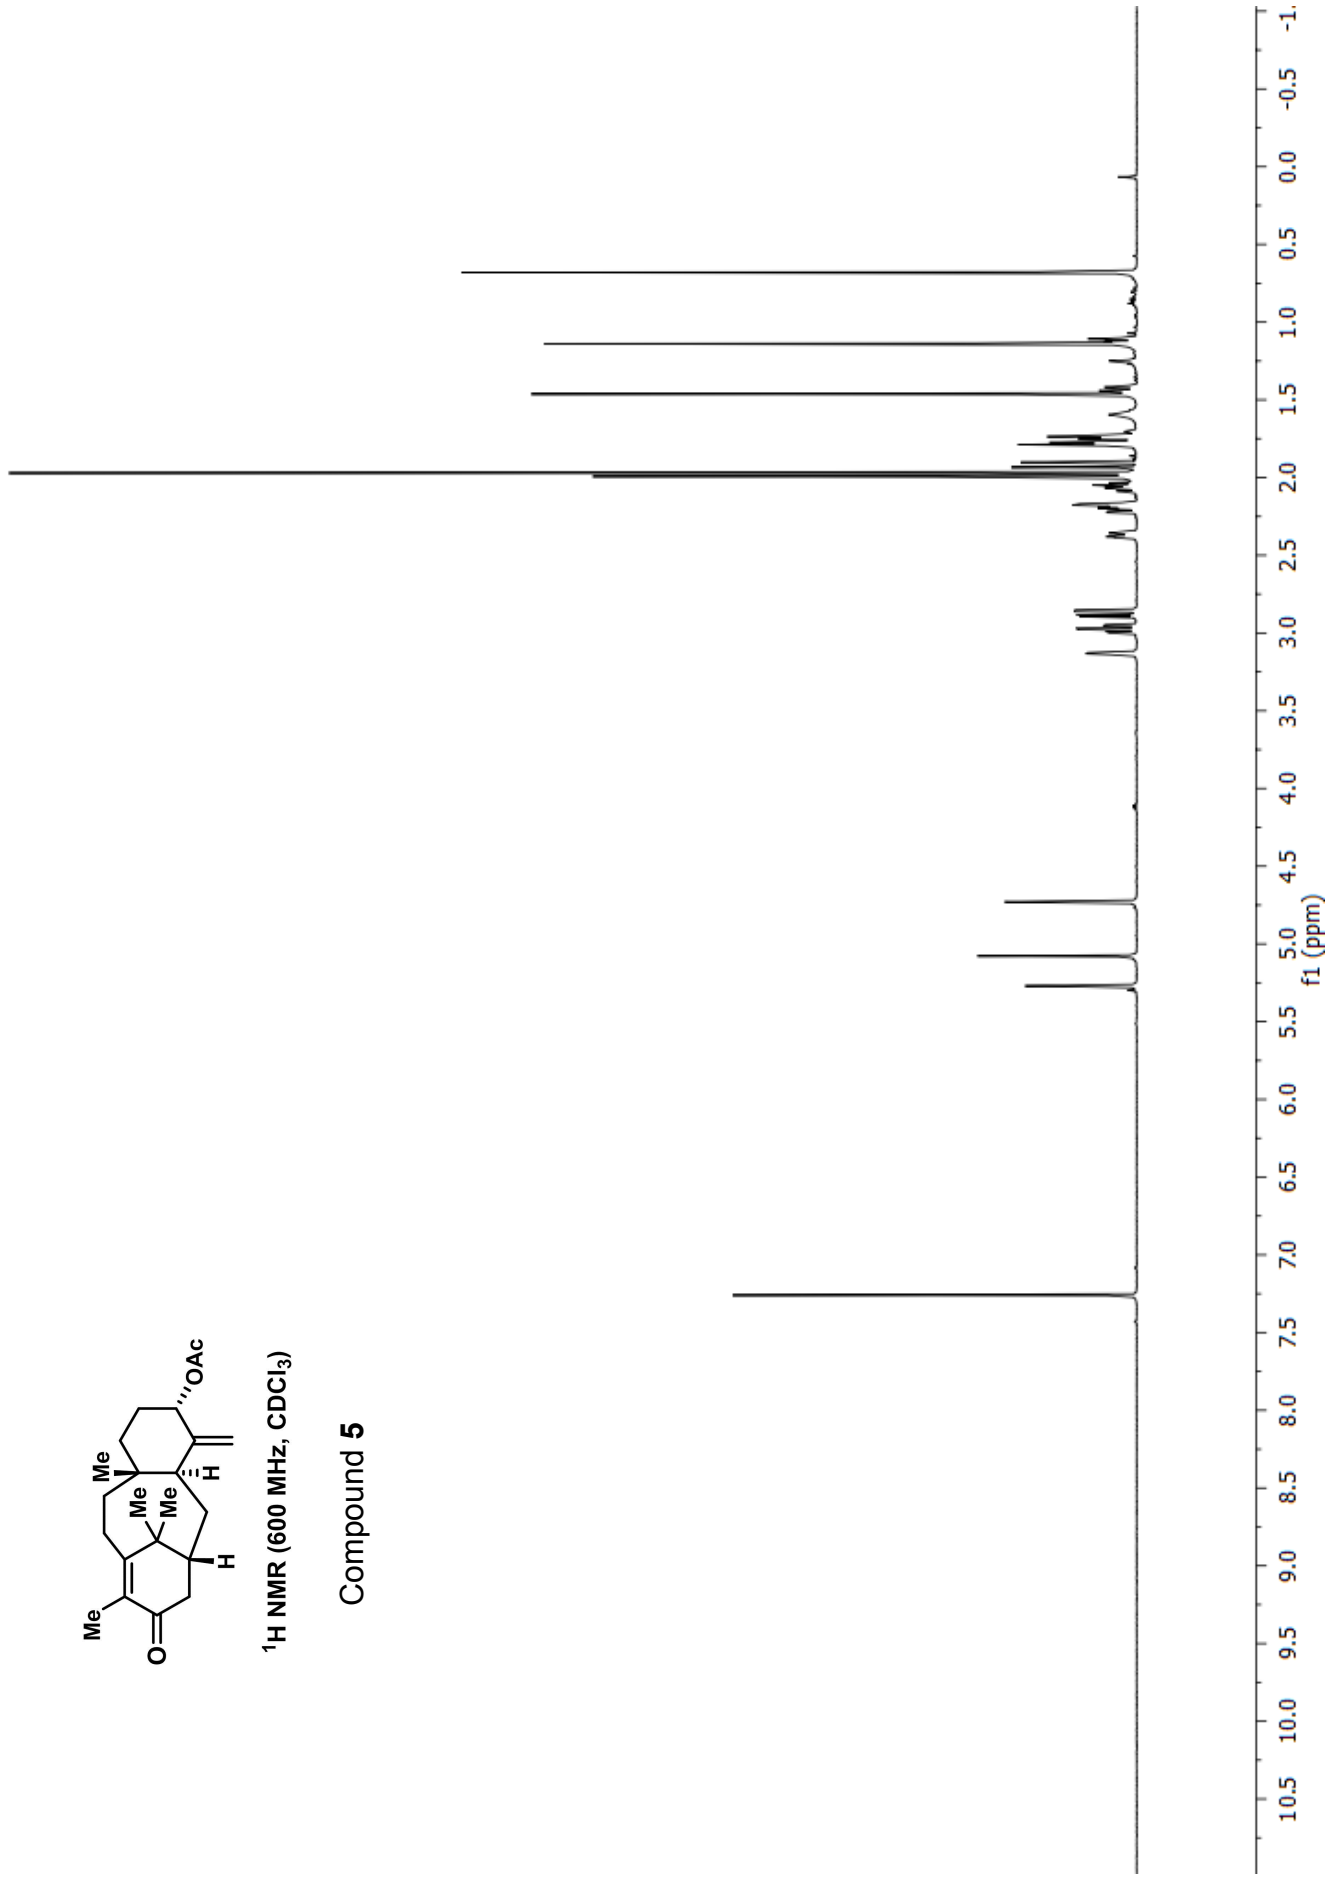

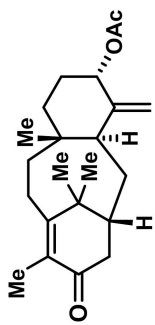

$^{13}\text{C}$  NMR (151 MHz,  $\text{CDCl}_3$ )

Compound **5**

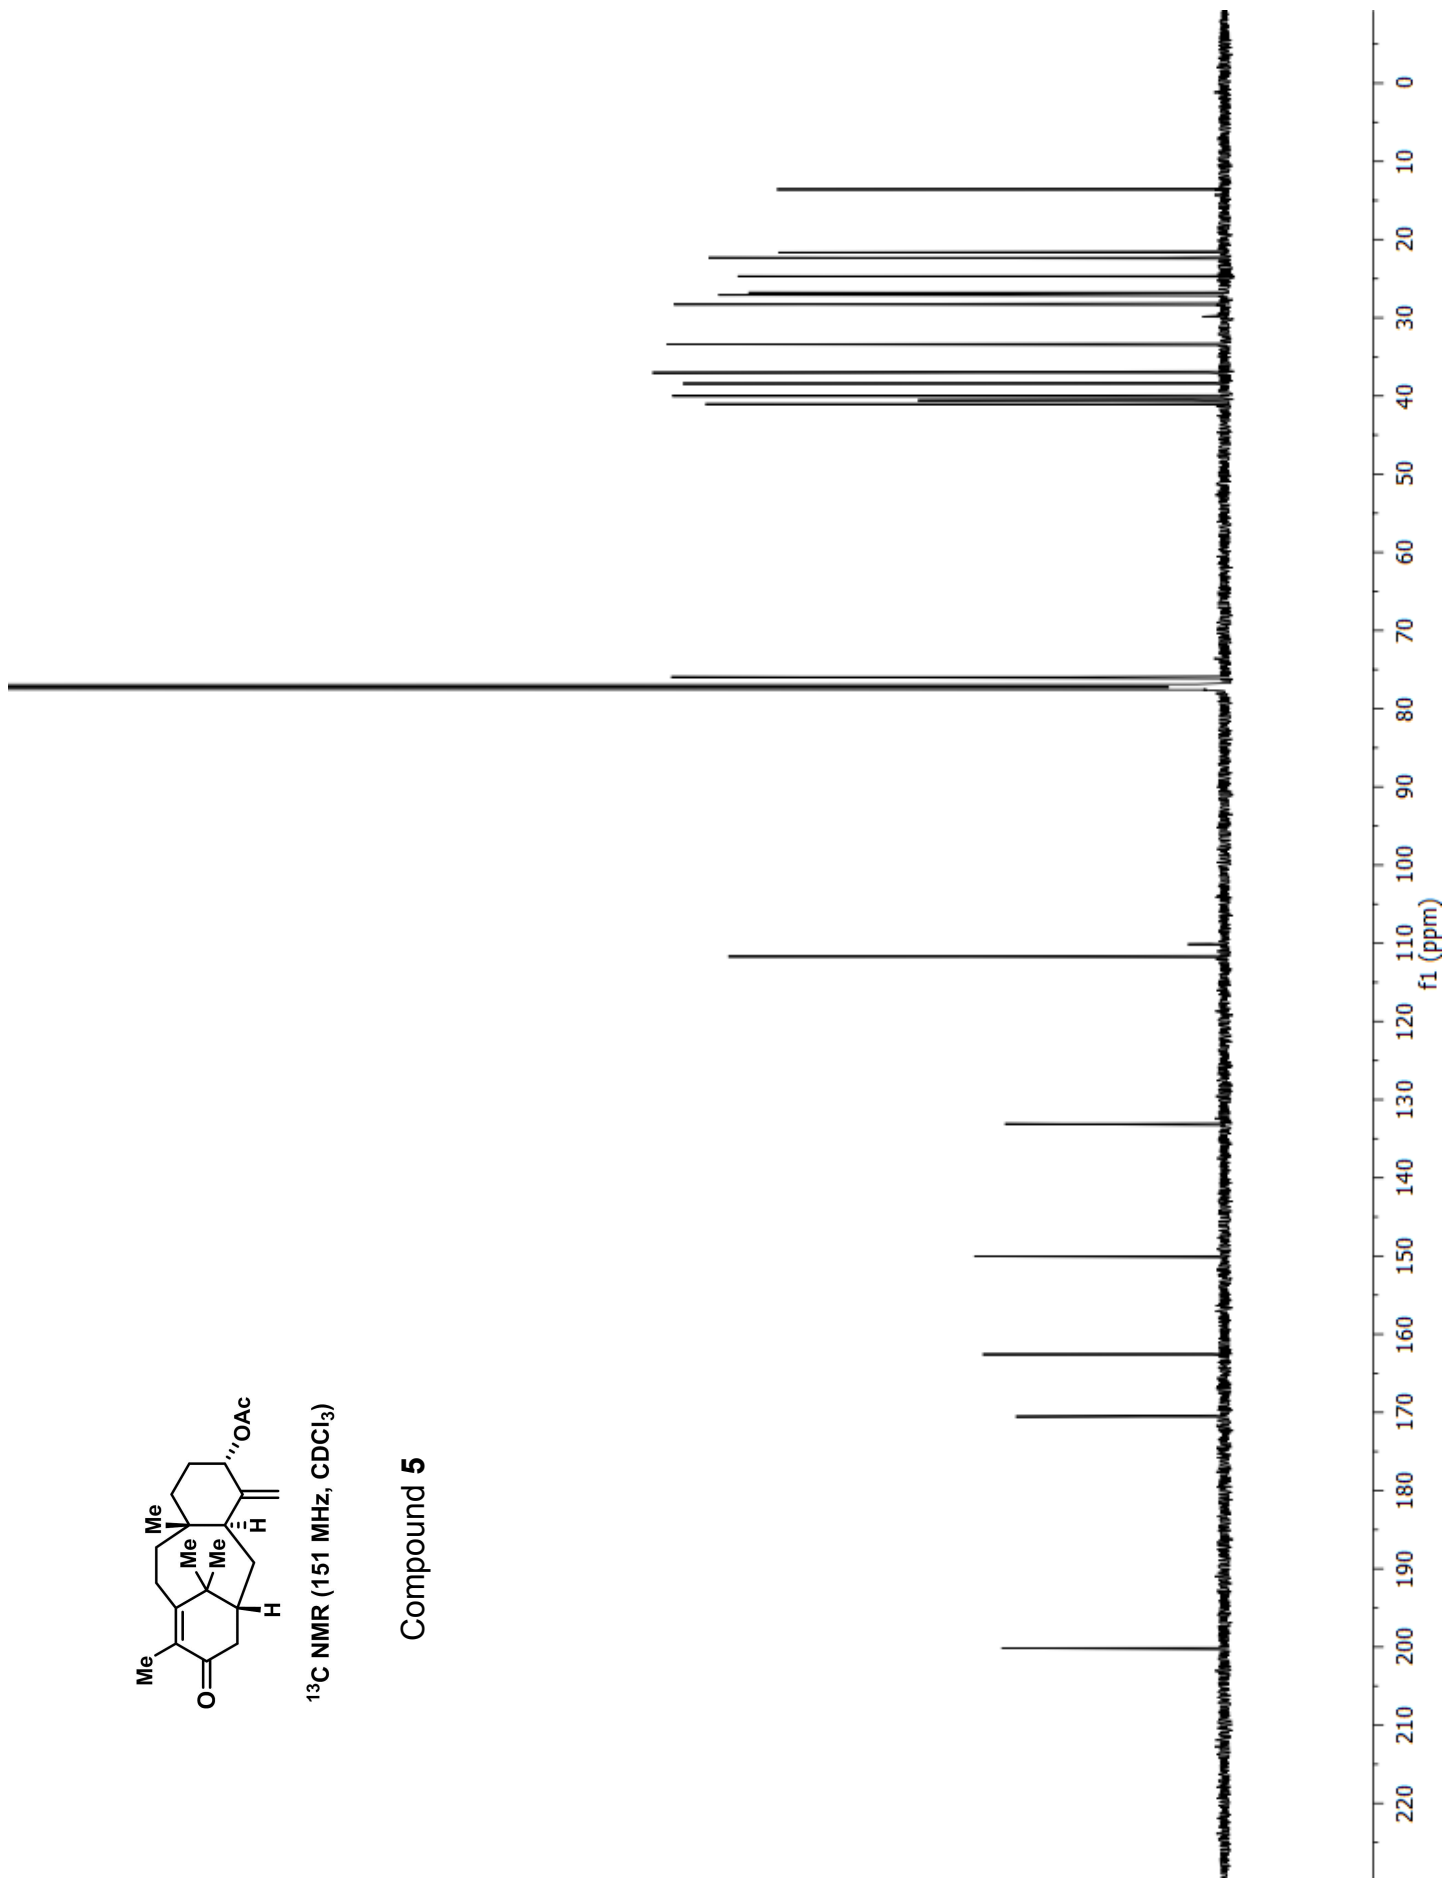

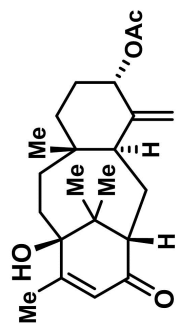

$^1\text{H}$  NMR (600 MHz,  $\text{CDCl}_3$ )

Compound **10**

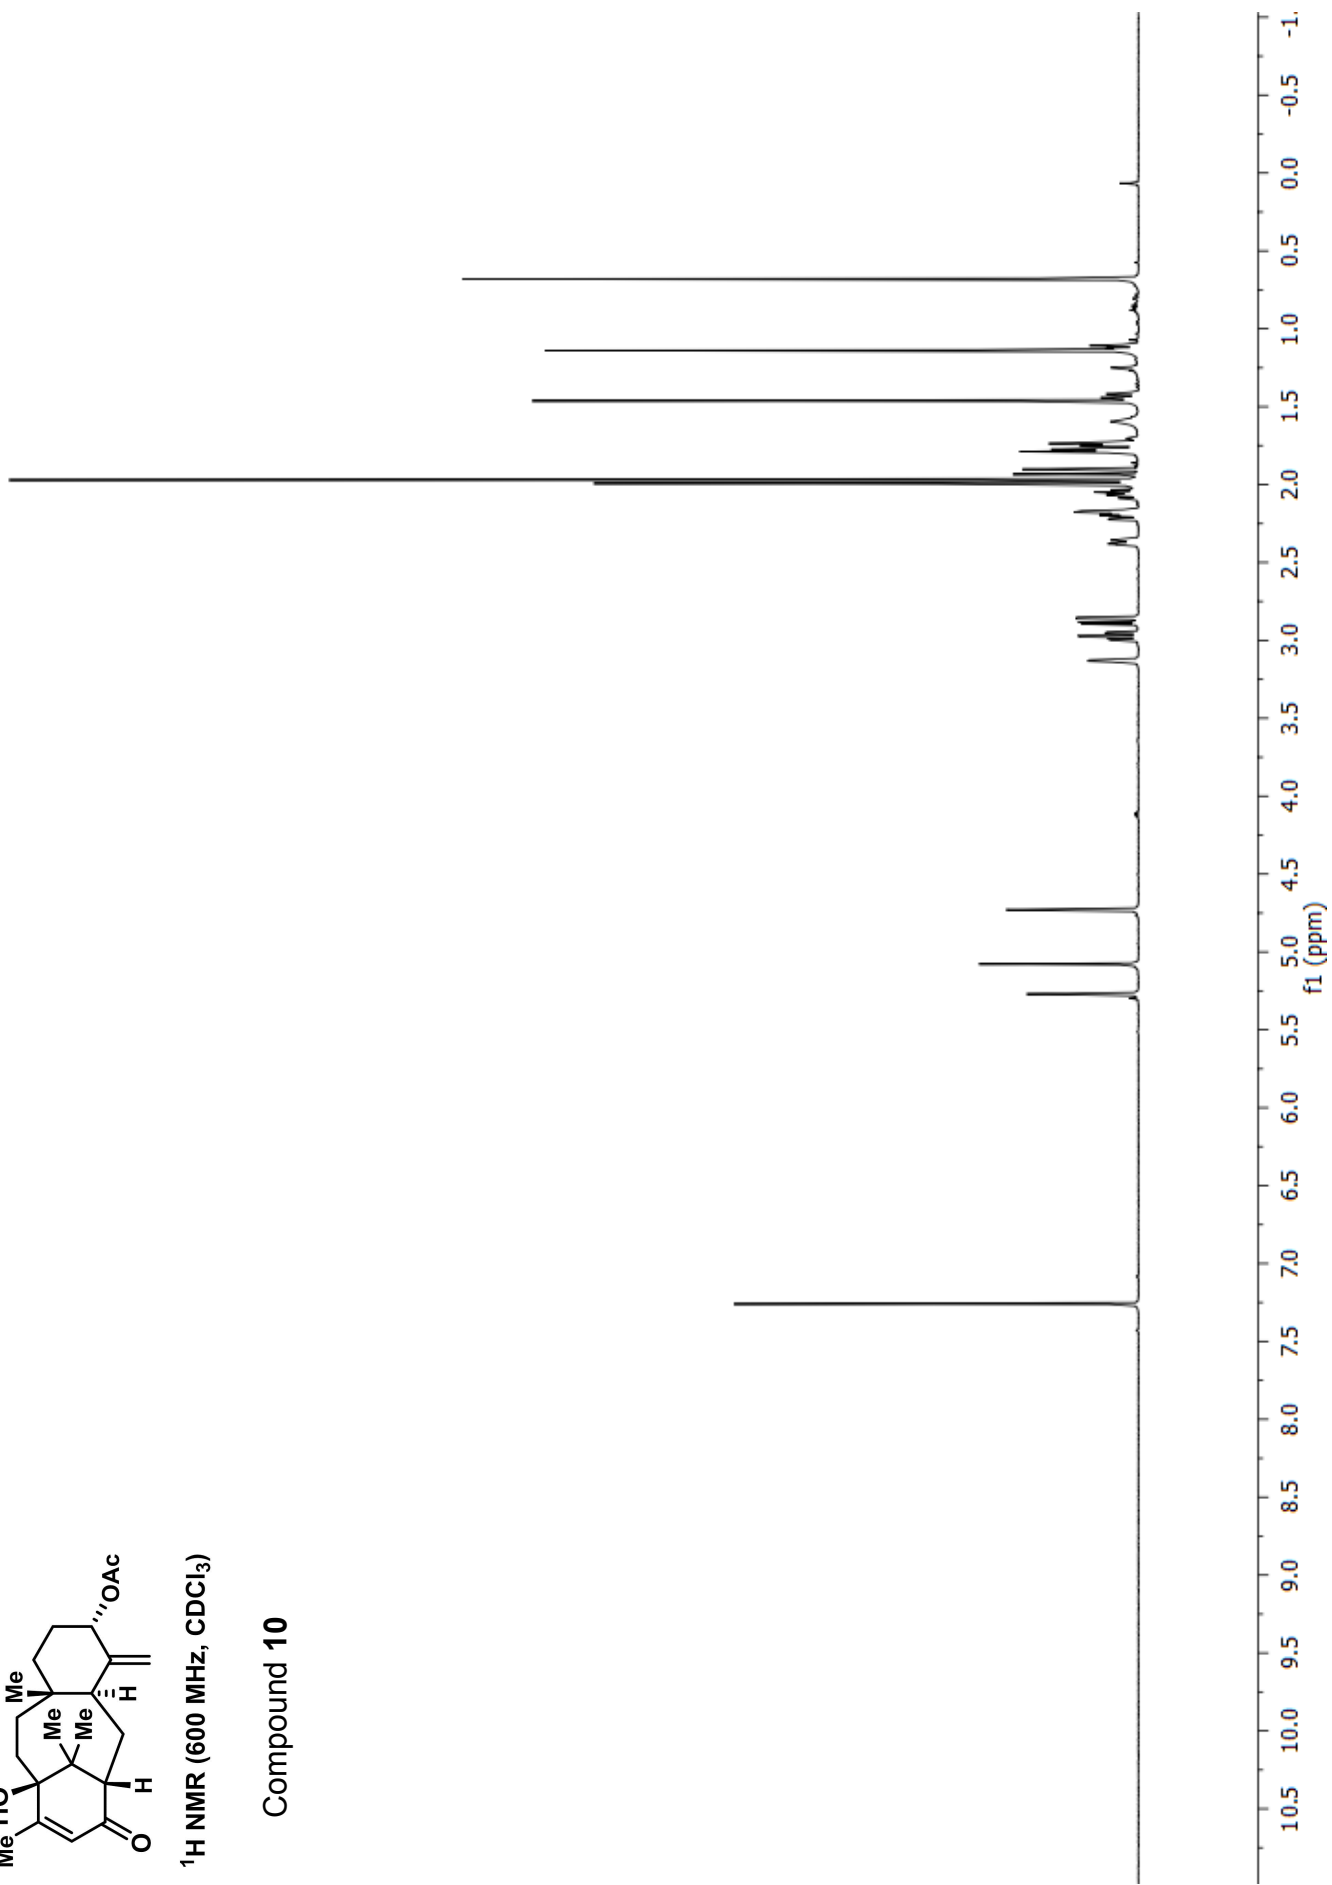

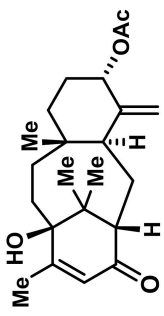

$^{13}\text{C}$  NMR (151 MHz,  $\text{CDCl}_3$ )

Compound 10

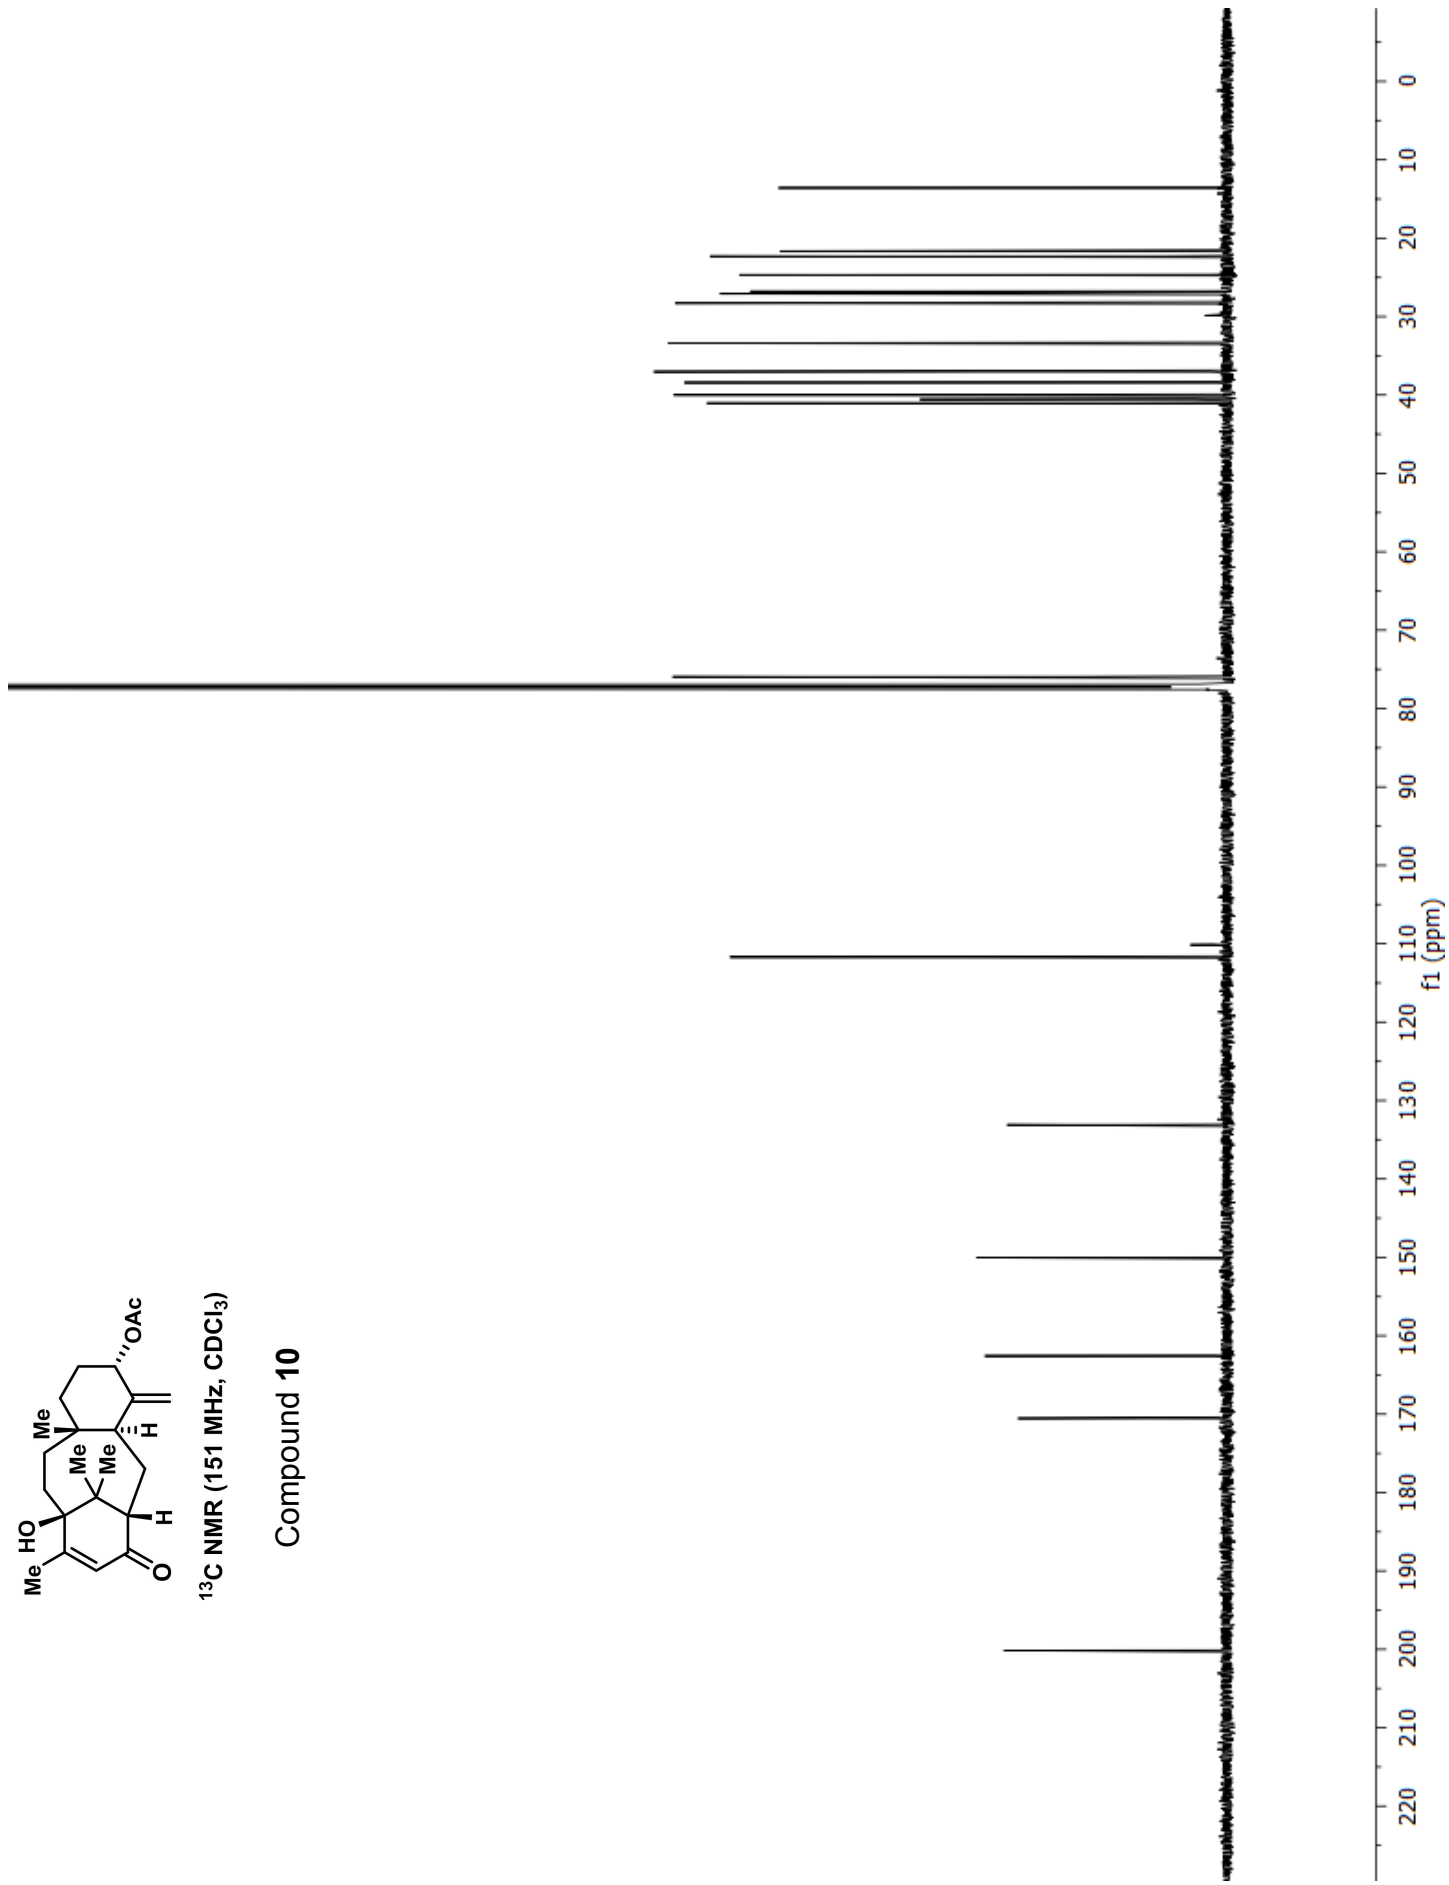





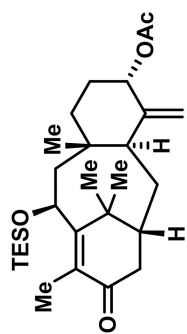

$^{13}\text{C}$  NMR (151 MHz,  $\text{CDCl}_3$ )

Compound **11**

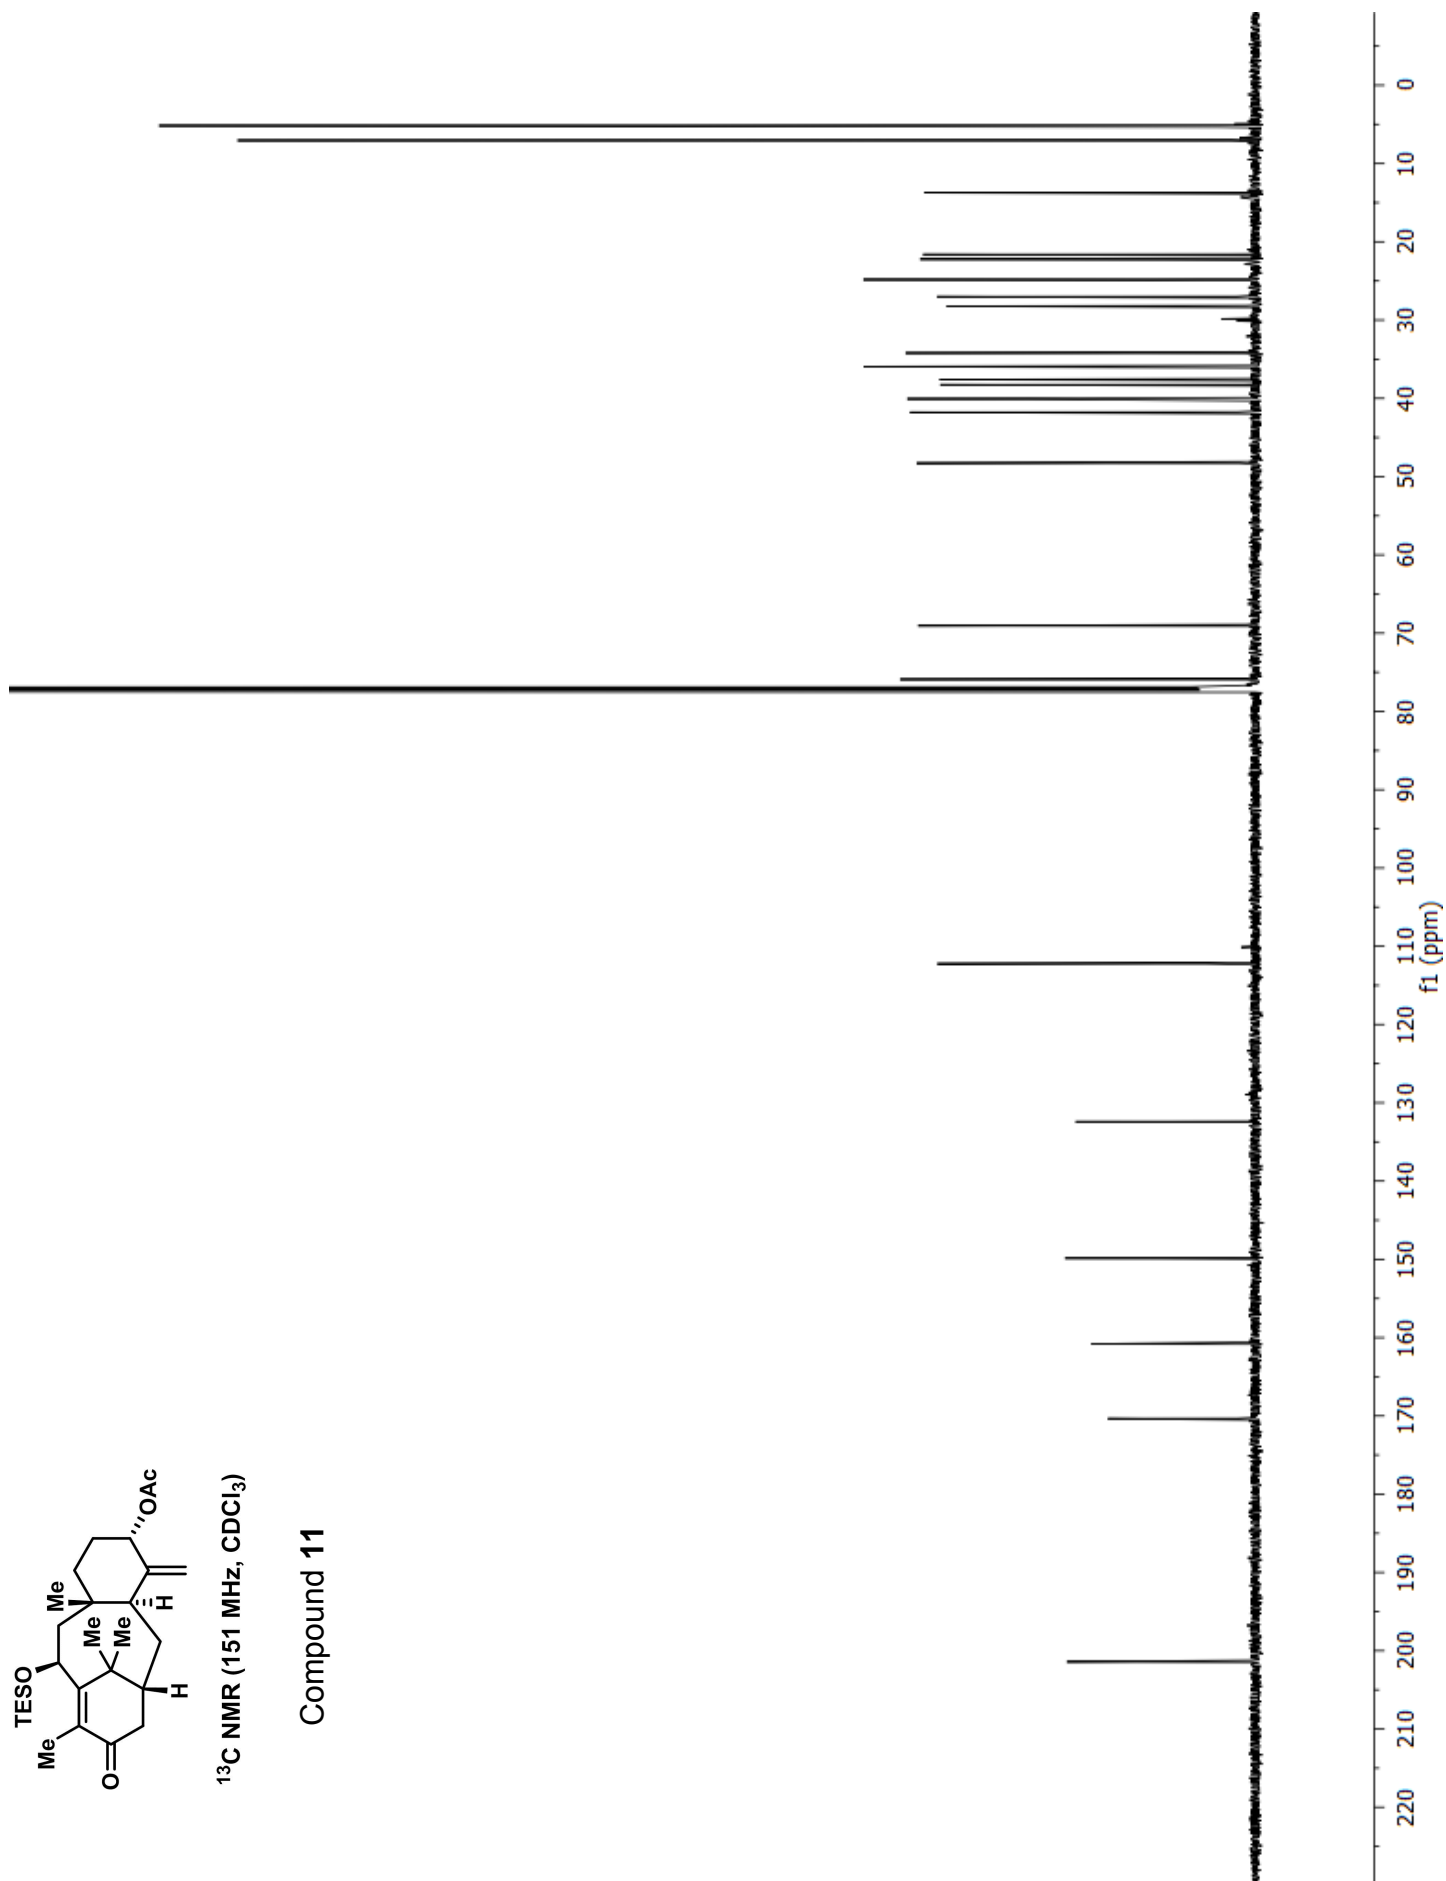

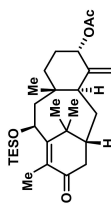

COSY NMR (600 MHz, CDCl<sub>3</sub>)

### Compound 11

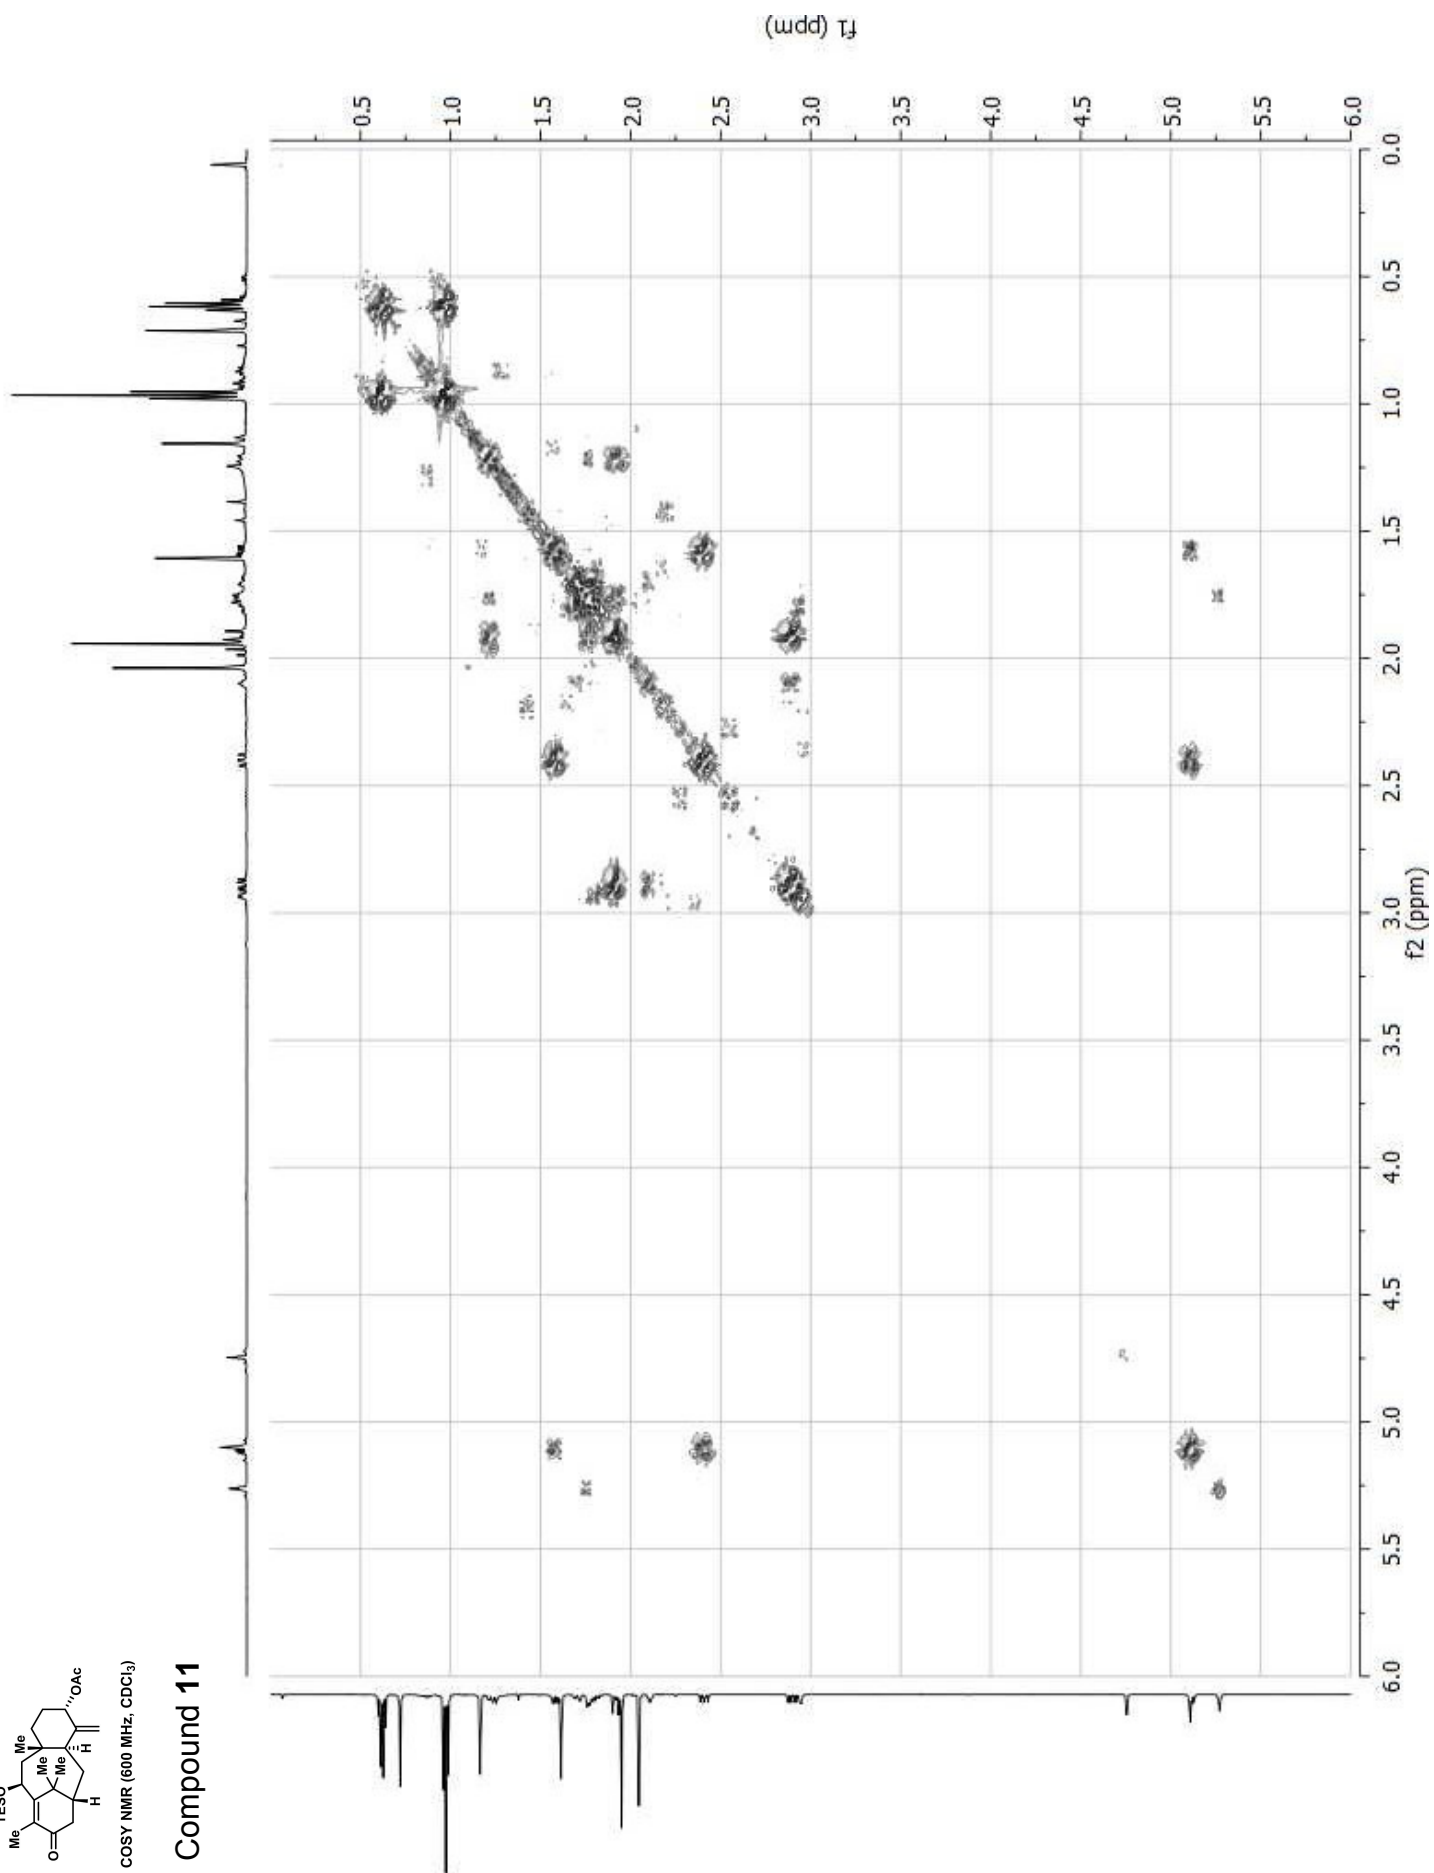

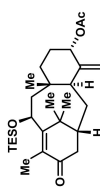

NOESY NMR (600 MHz, CDCl<sub>3</sub>)

### Compound 11

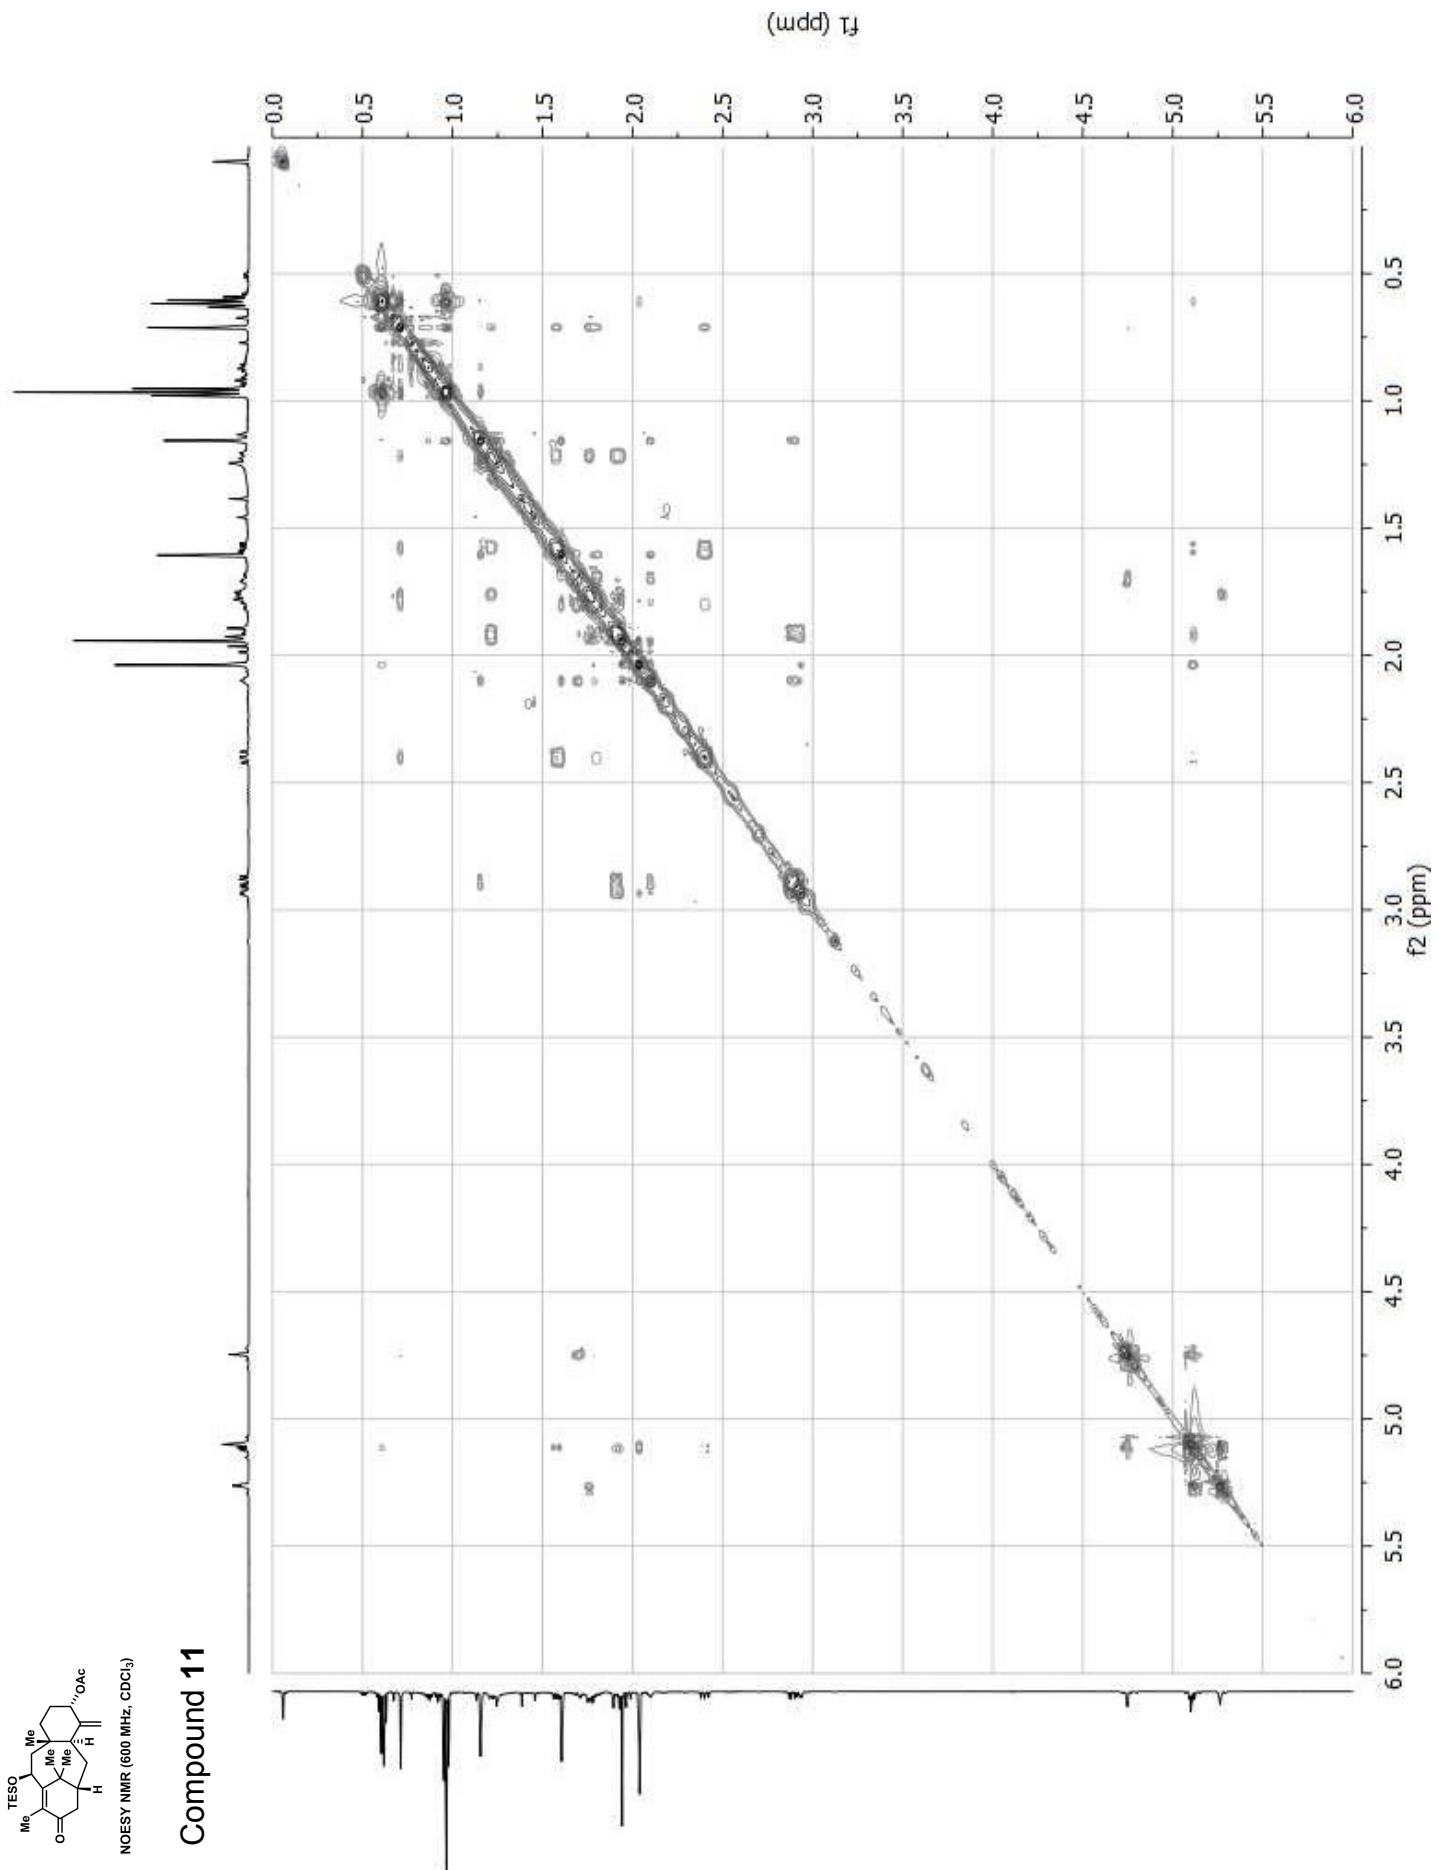

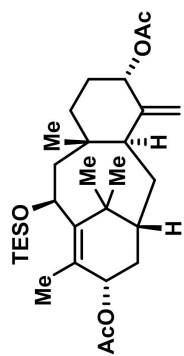

<sup>1</sup>H NMR (600 MHz, CDCl<sub>3</sub>)

Compound 12

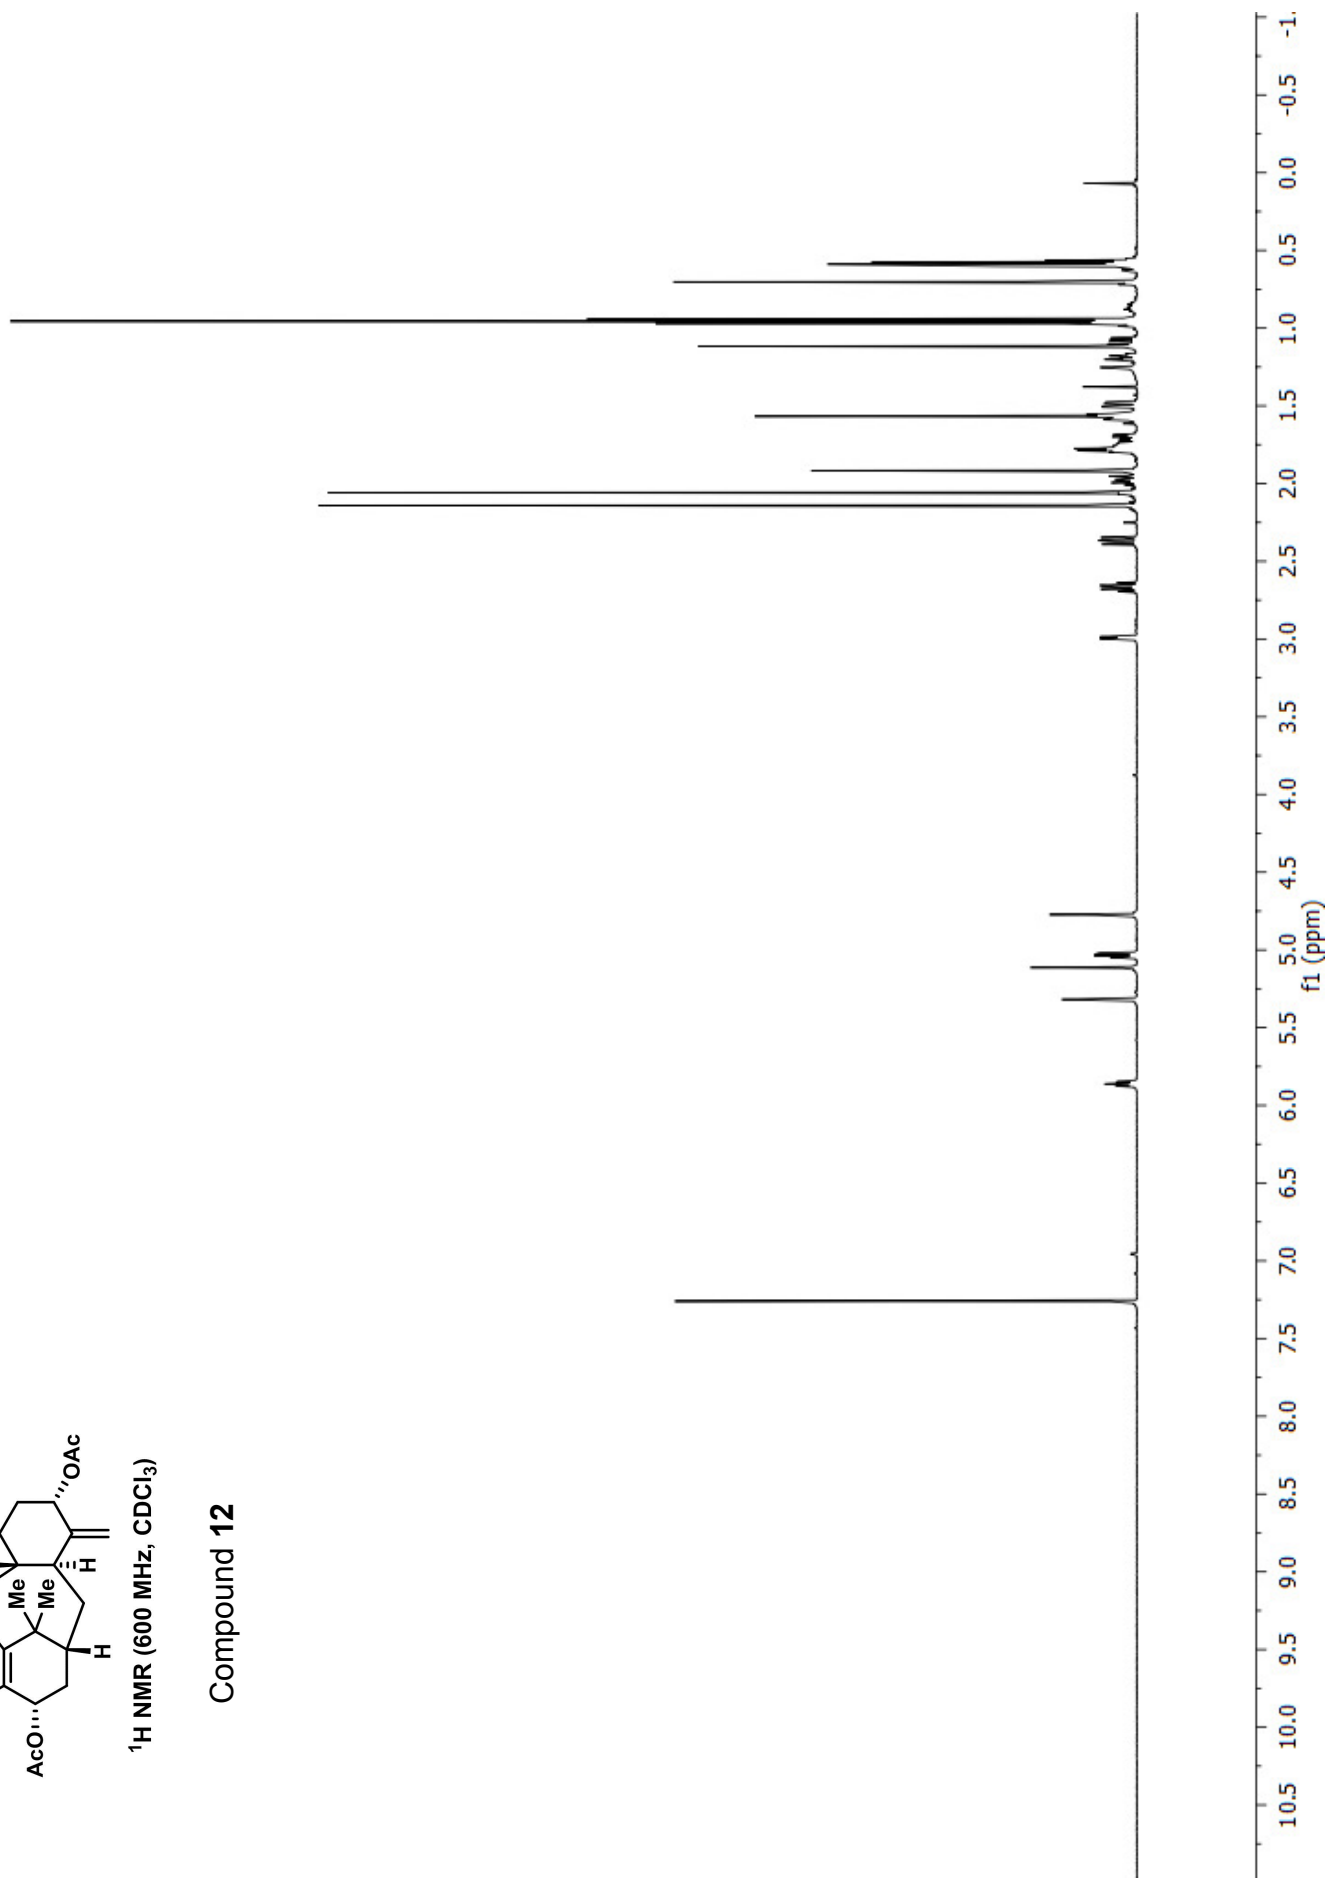

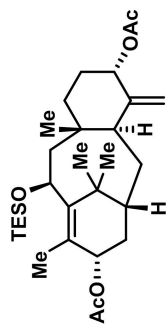

$^{13}\text{C}$  NMR (151 MHz,  $\text{CDCl}_3$ )

Compound 12

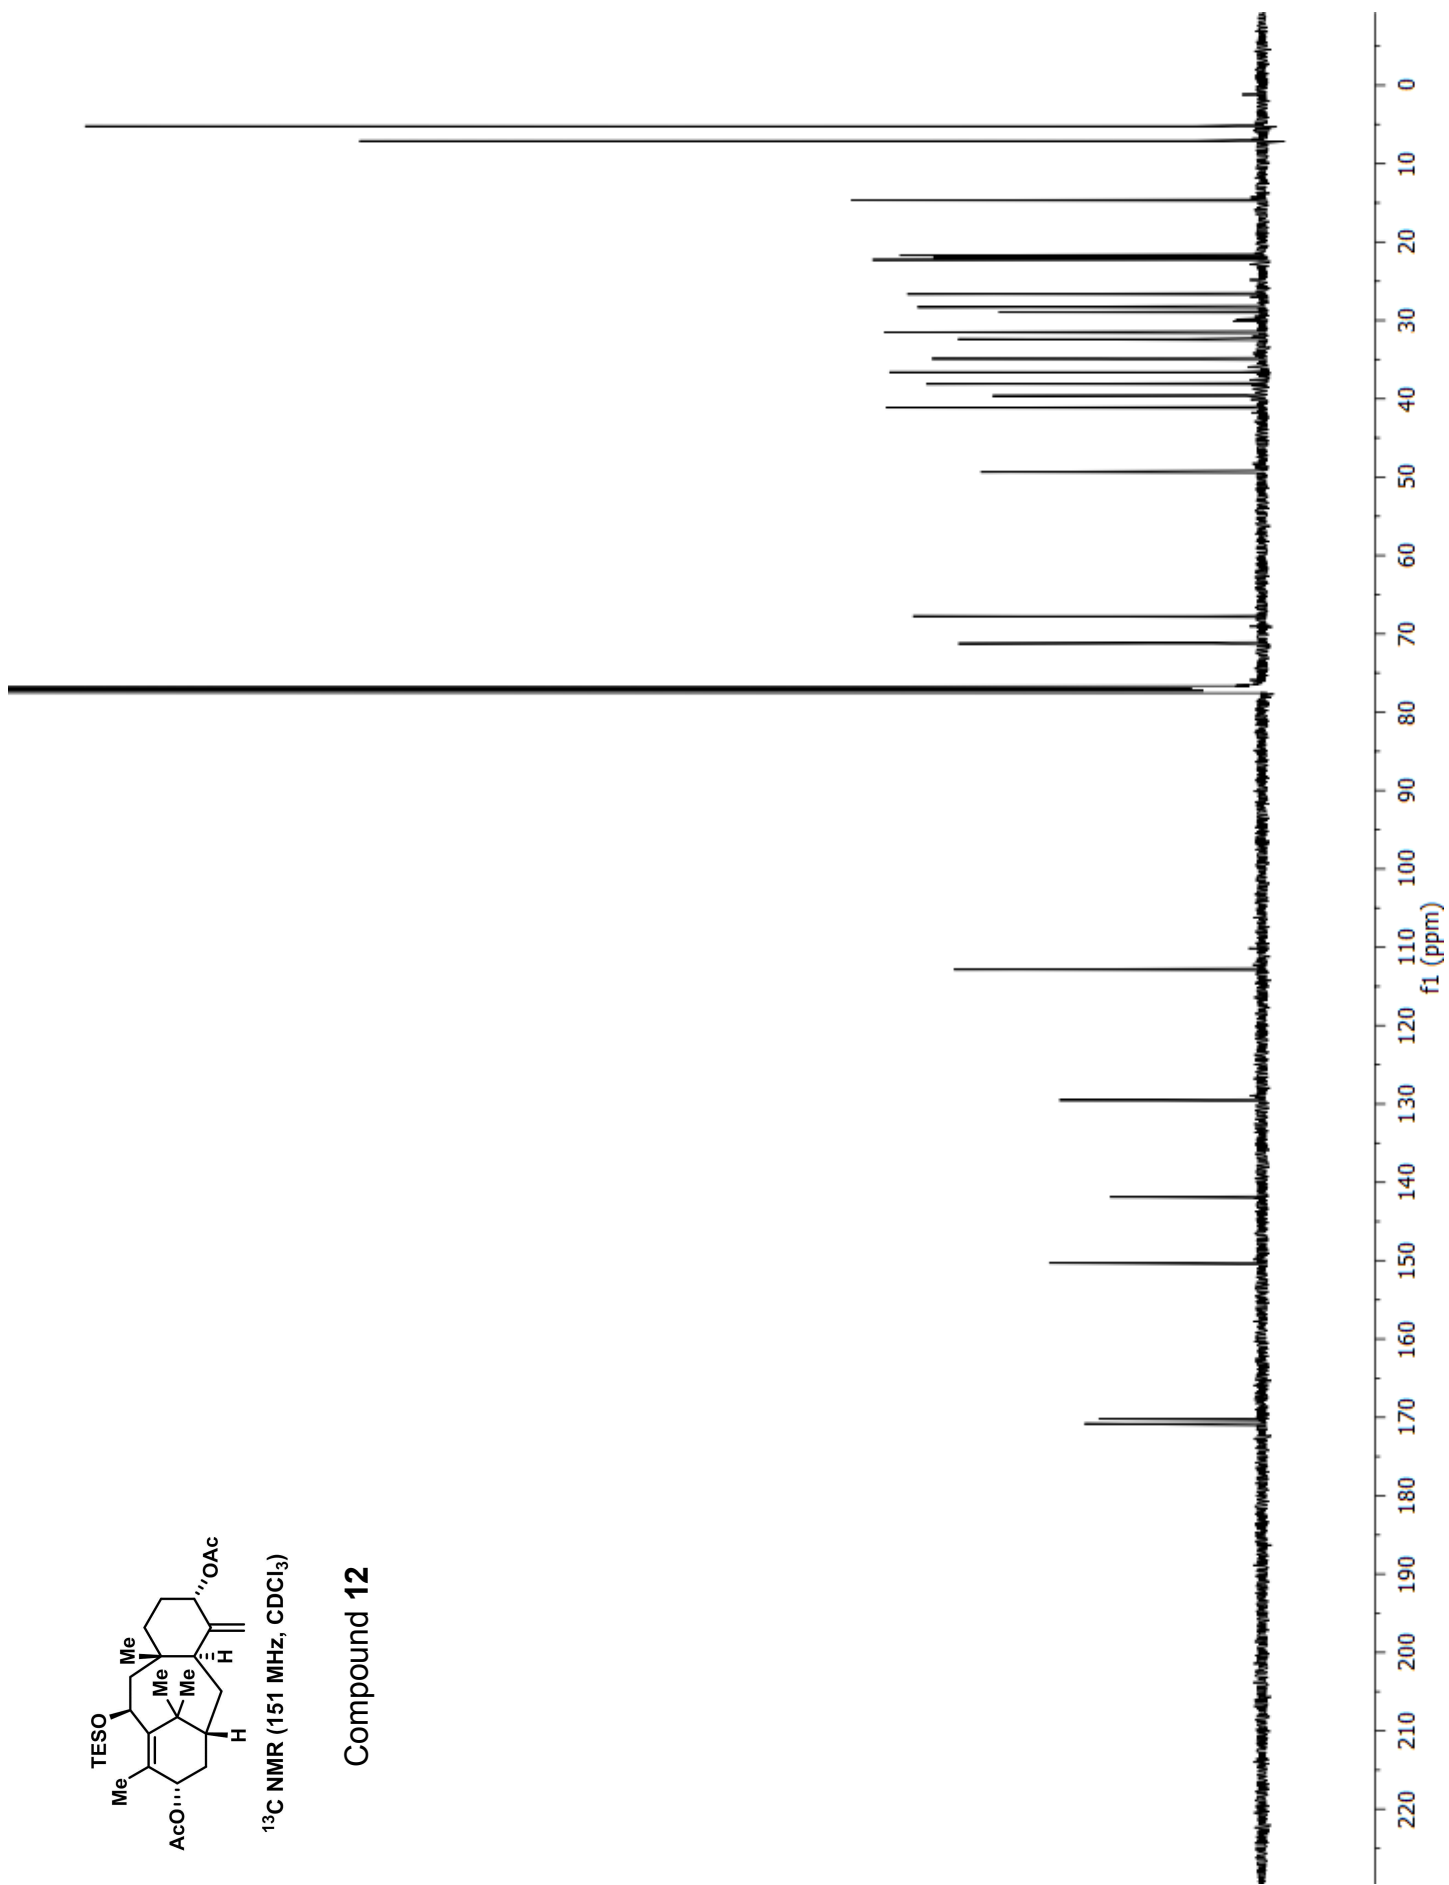

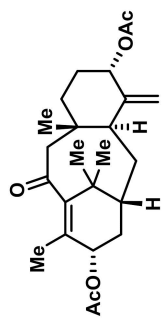

$^1\text{H}$  NMR (600 MHz,  $\text{CDCl}_3$ )

Compound **3**

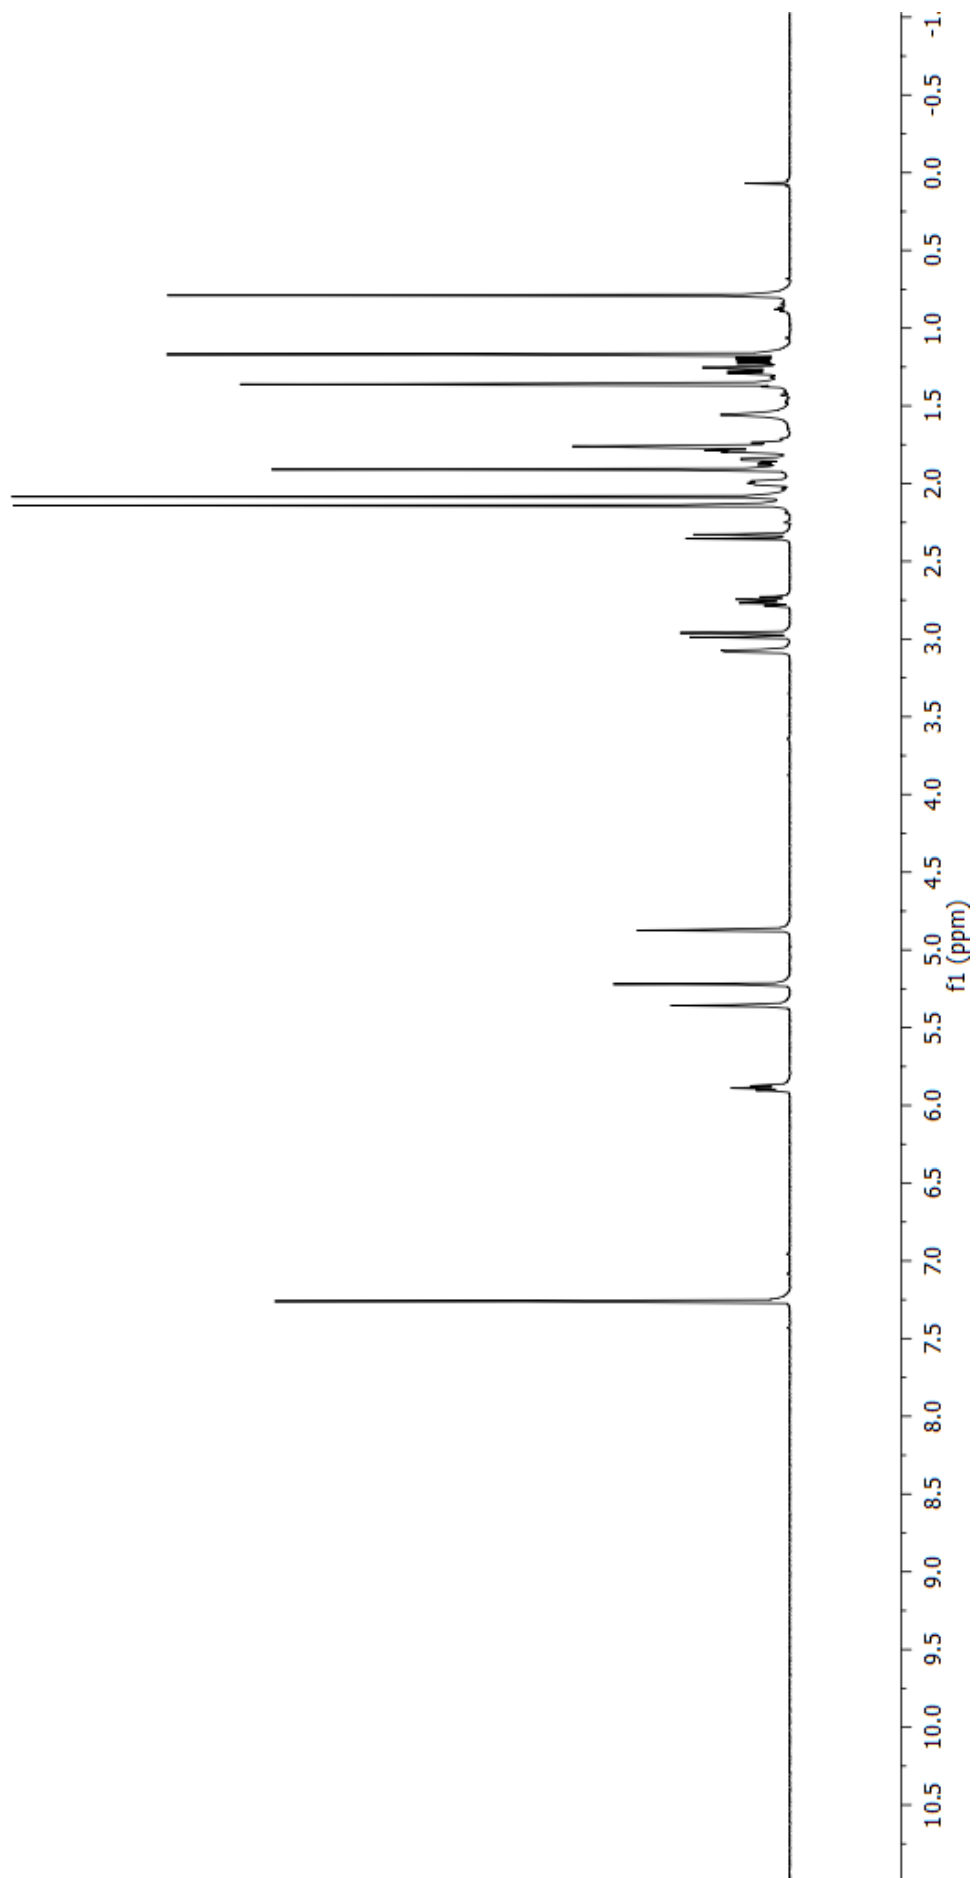

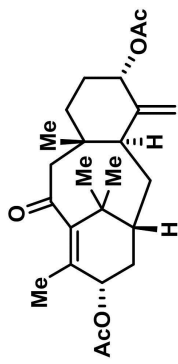

$^{13}\text{C}$  NMR (151 MHz,  $\text{CDCl}_3$ )

Compound **3**

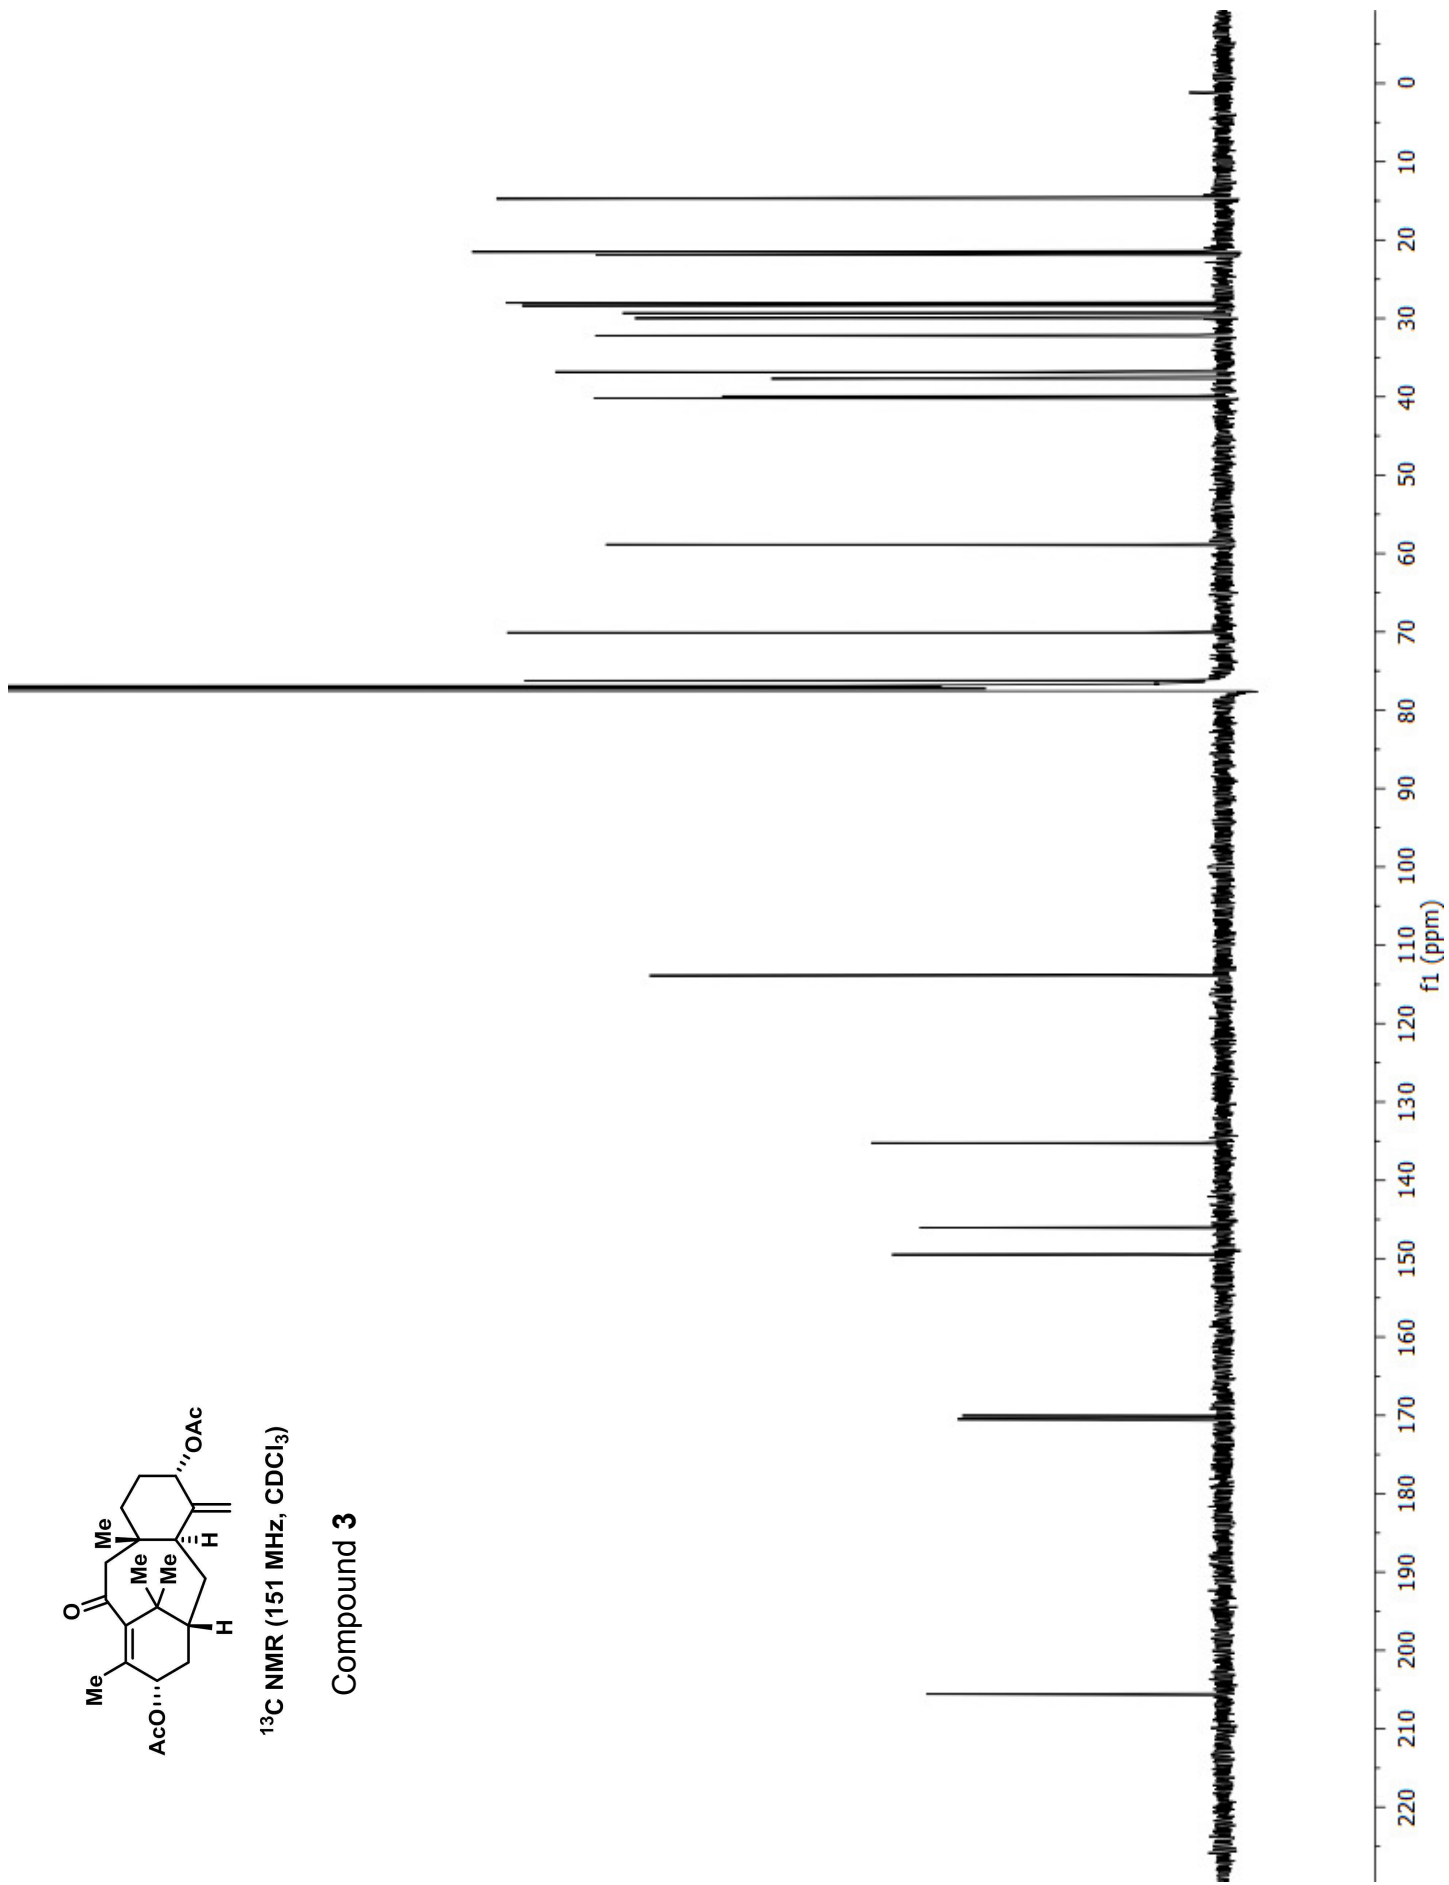



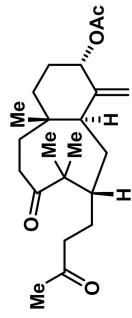

<sup>1</sup>H NMR (600 MHz, CDCl<sub>3</sub>)

Compound 7

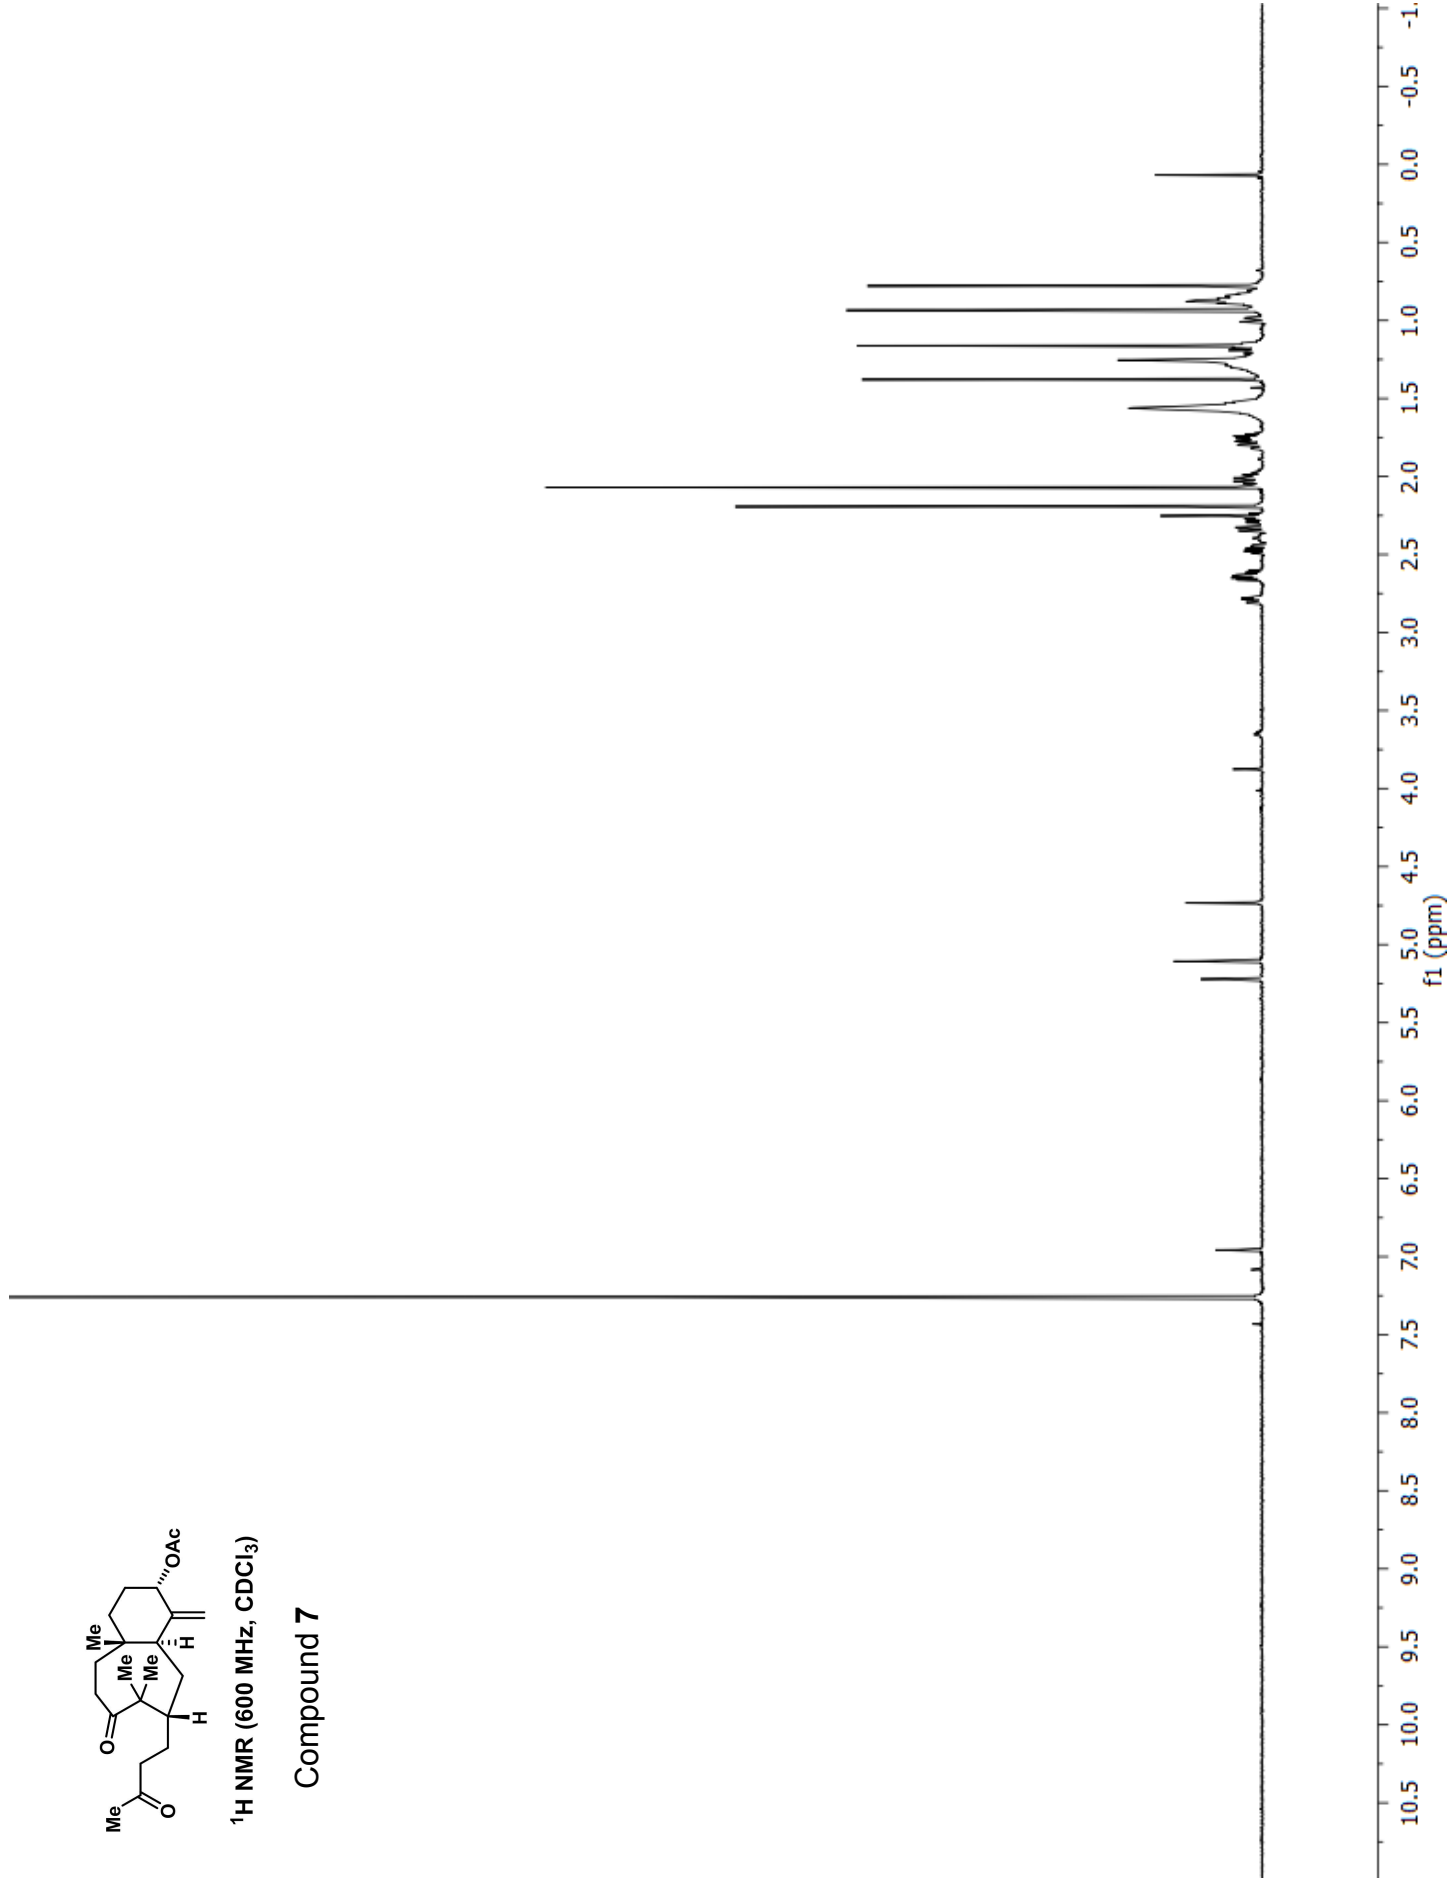

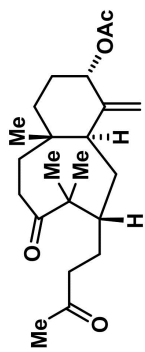

$^{13}\text{C}$  NMR (151 MHz,  $\text{CDCl}_3$ )

Compound 7

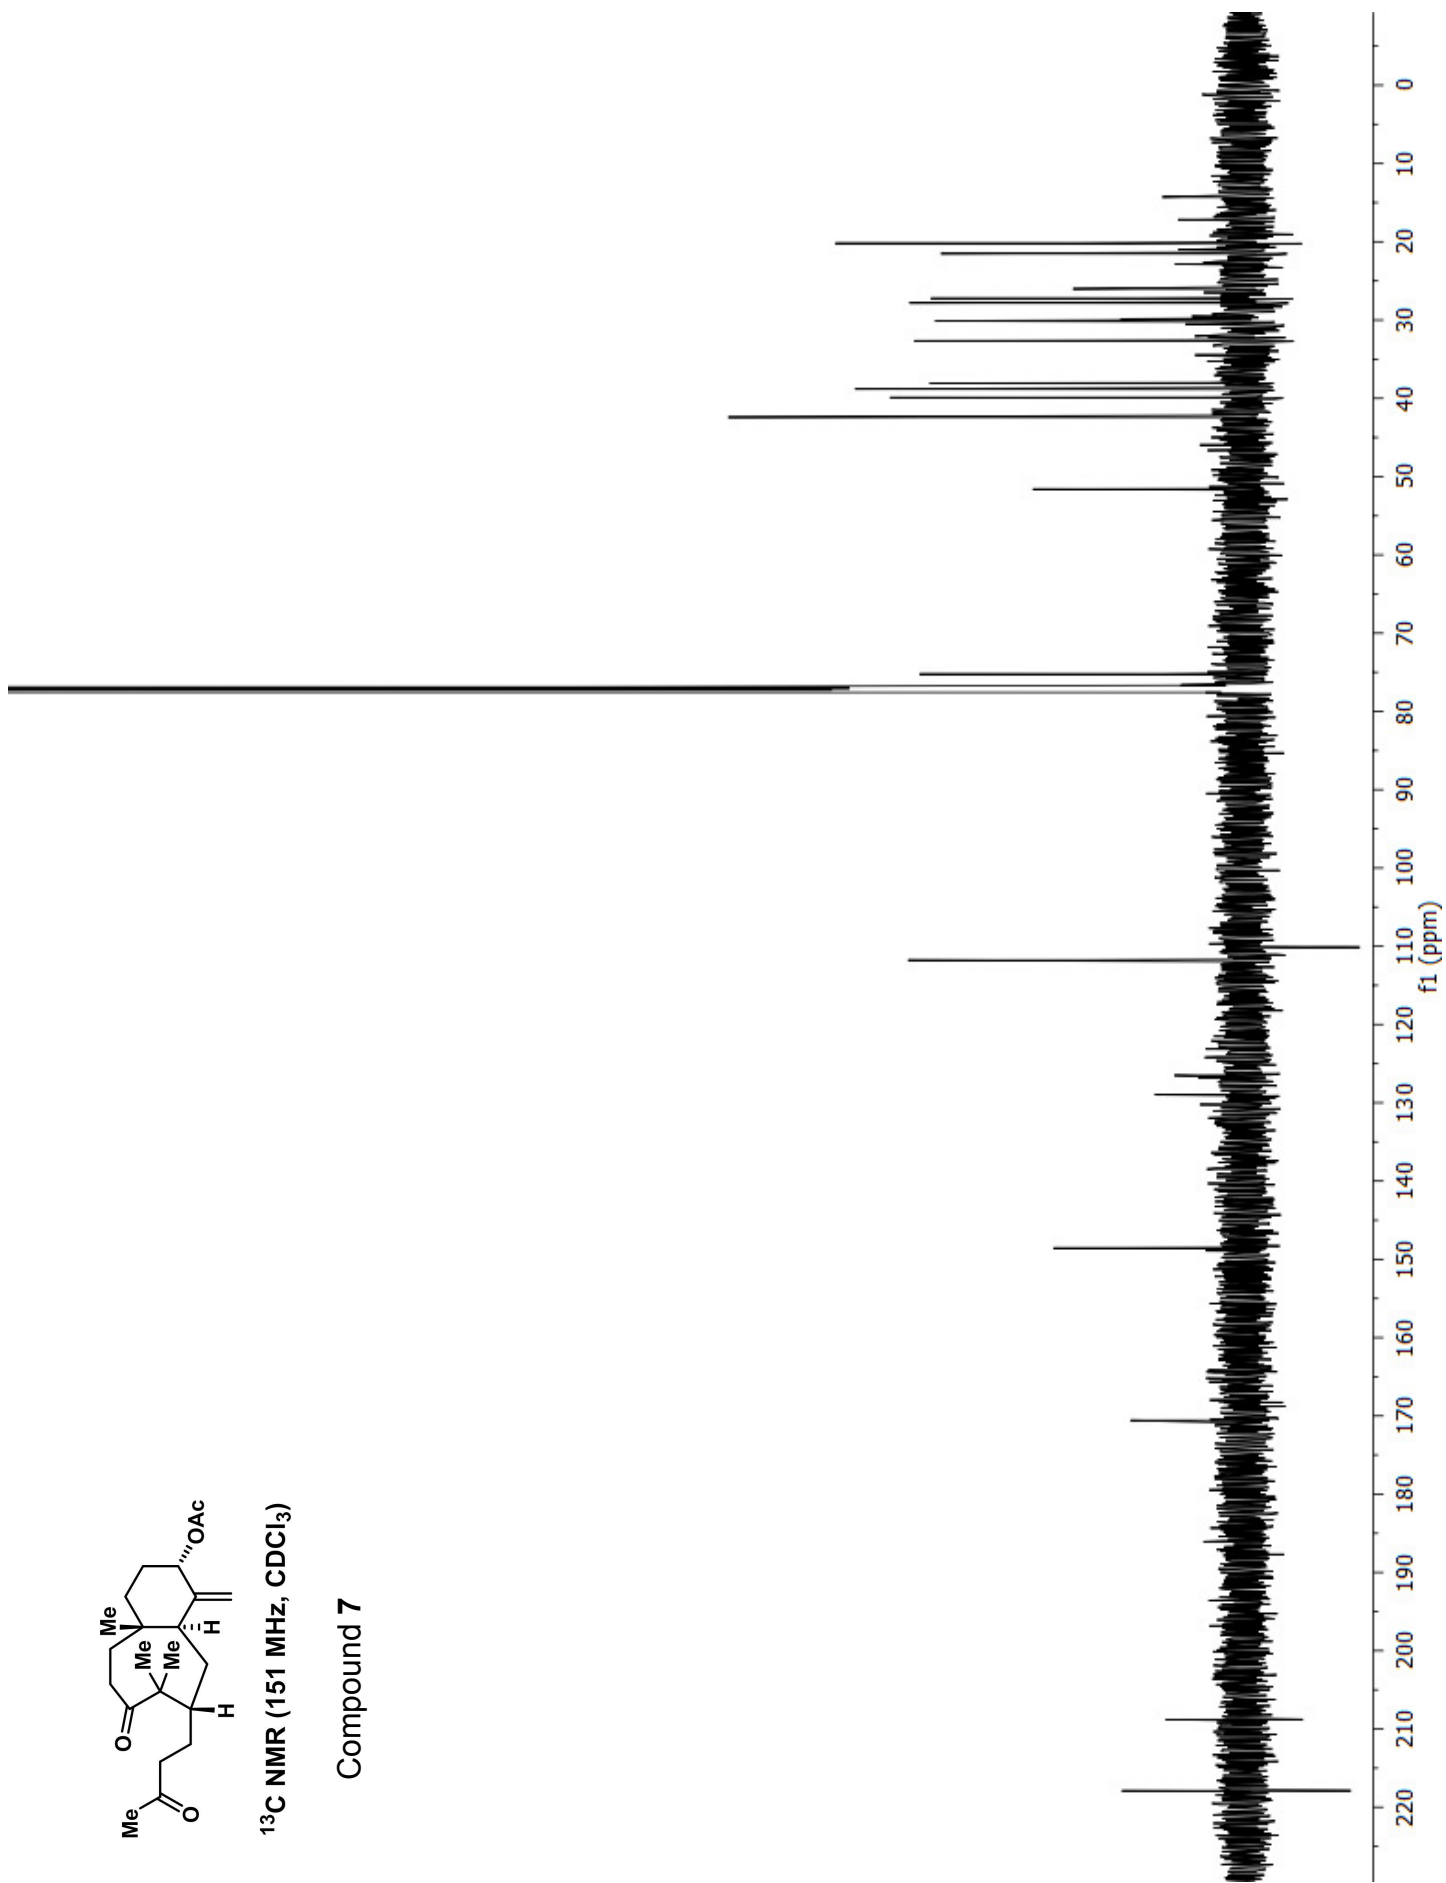

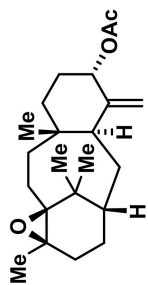

<sup>1</sup>H NMR (600 MHz, CDCl<sub>3</sub>)

Compound **8**

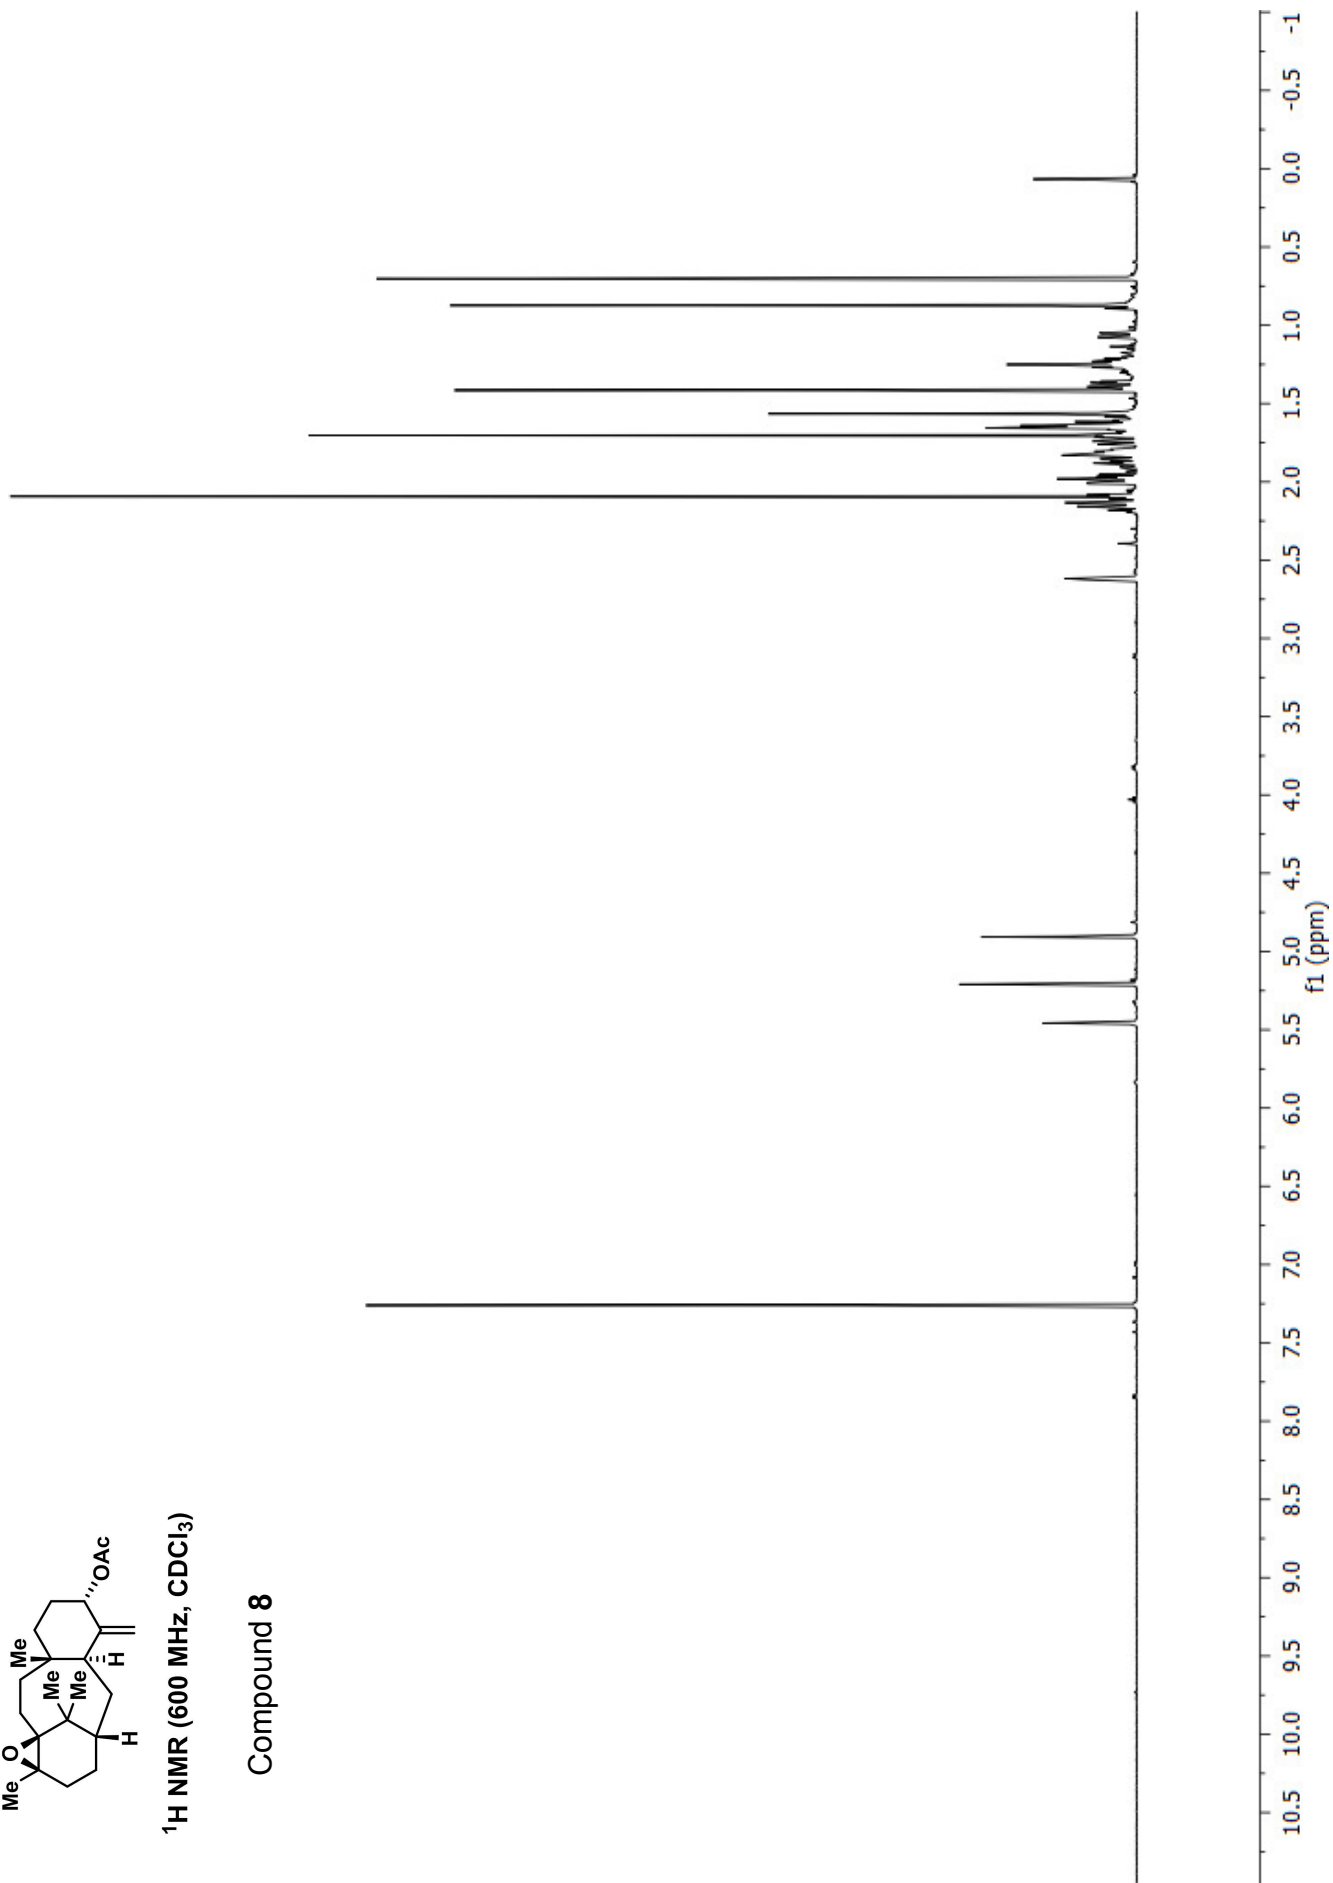

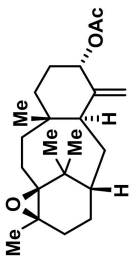

$^{13}\text{C}$  NMR (151 MHz,  $\text{CDCl}_3$ )

Compound 8

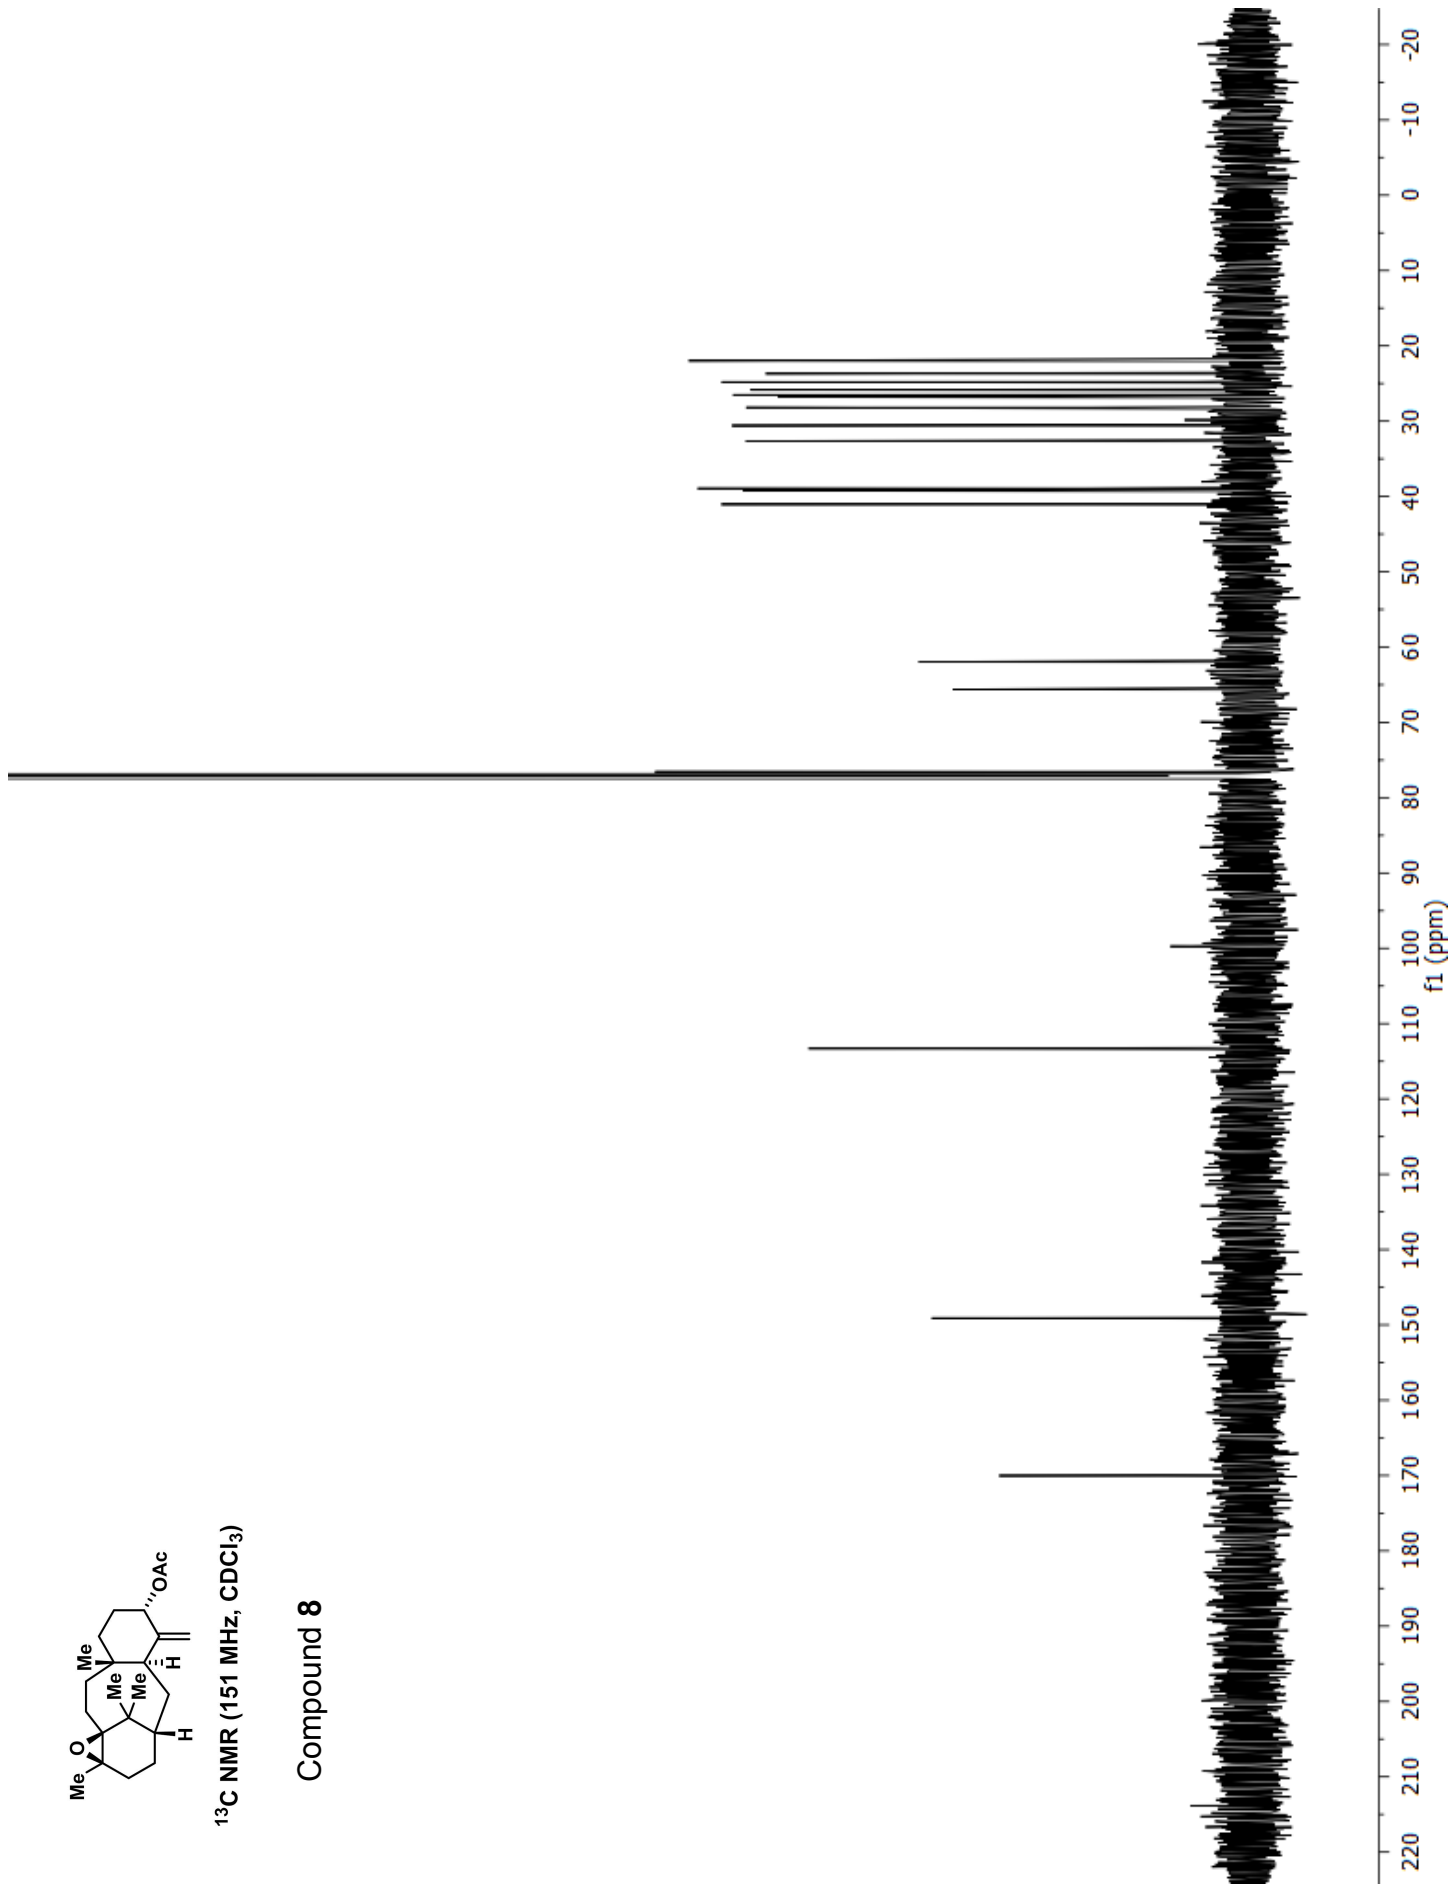

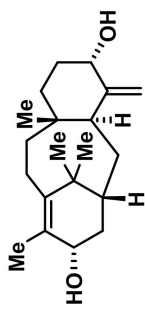

<sup>1</sup>H NMR (600 MHz, CDCl<sub>3</sub>)

Compound **S1**

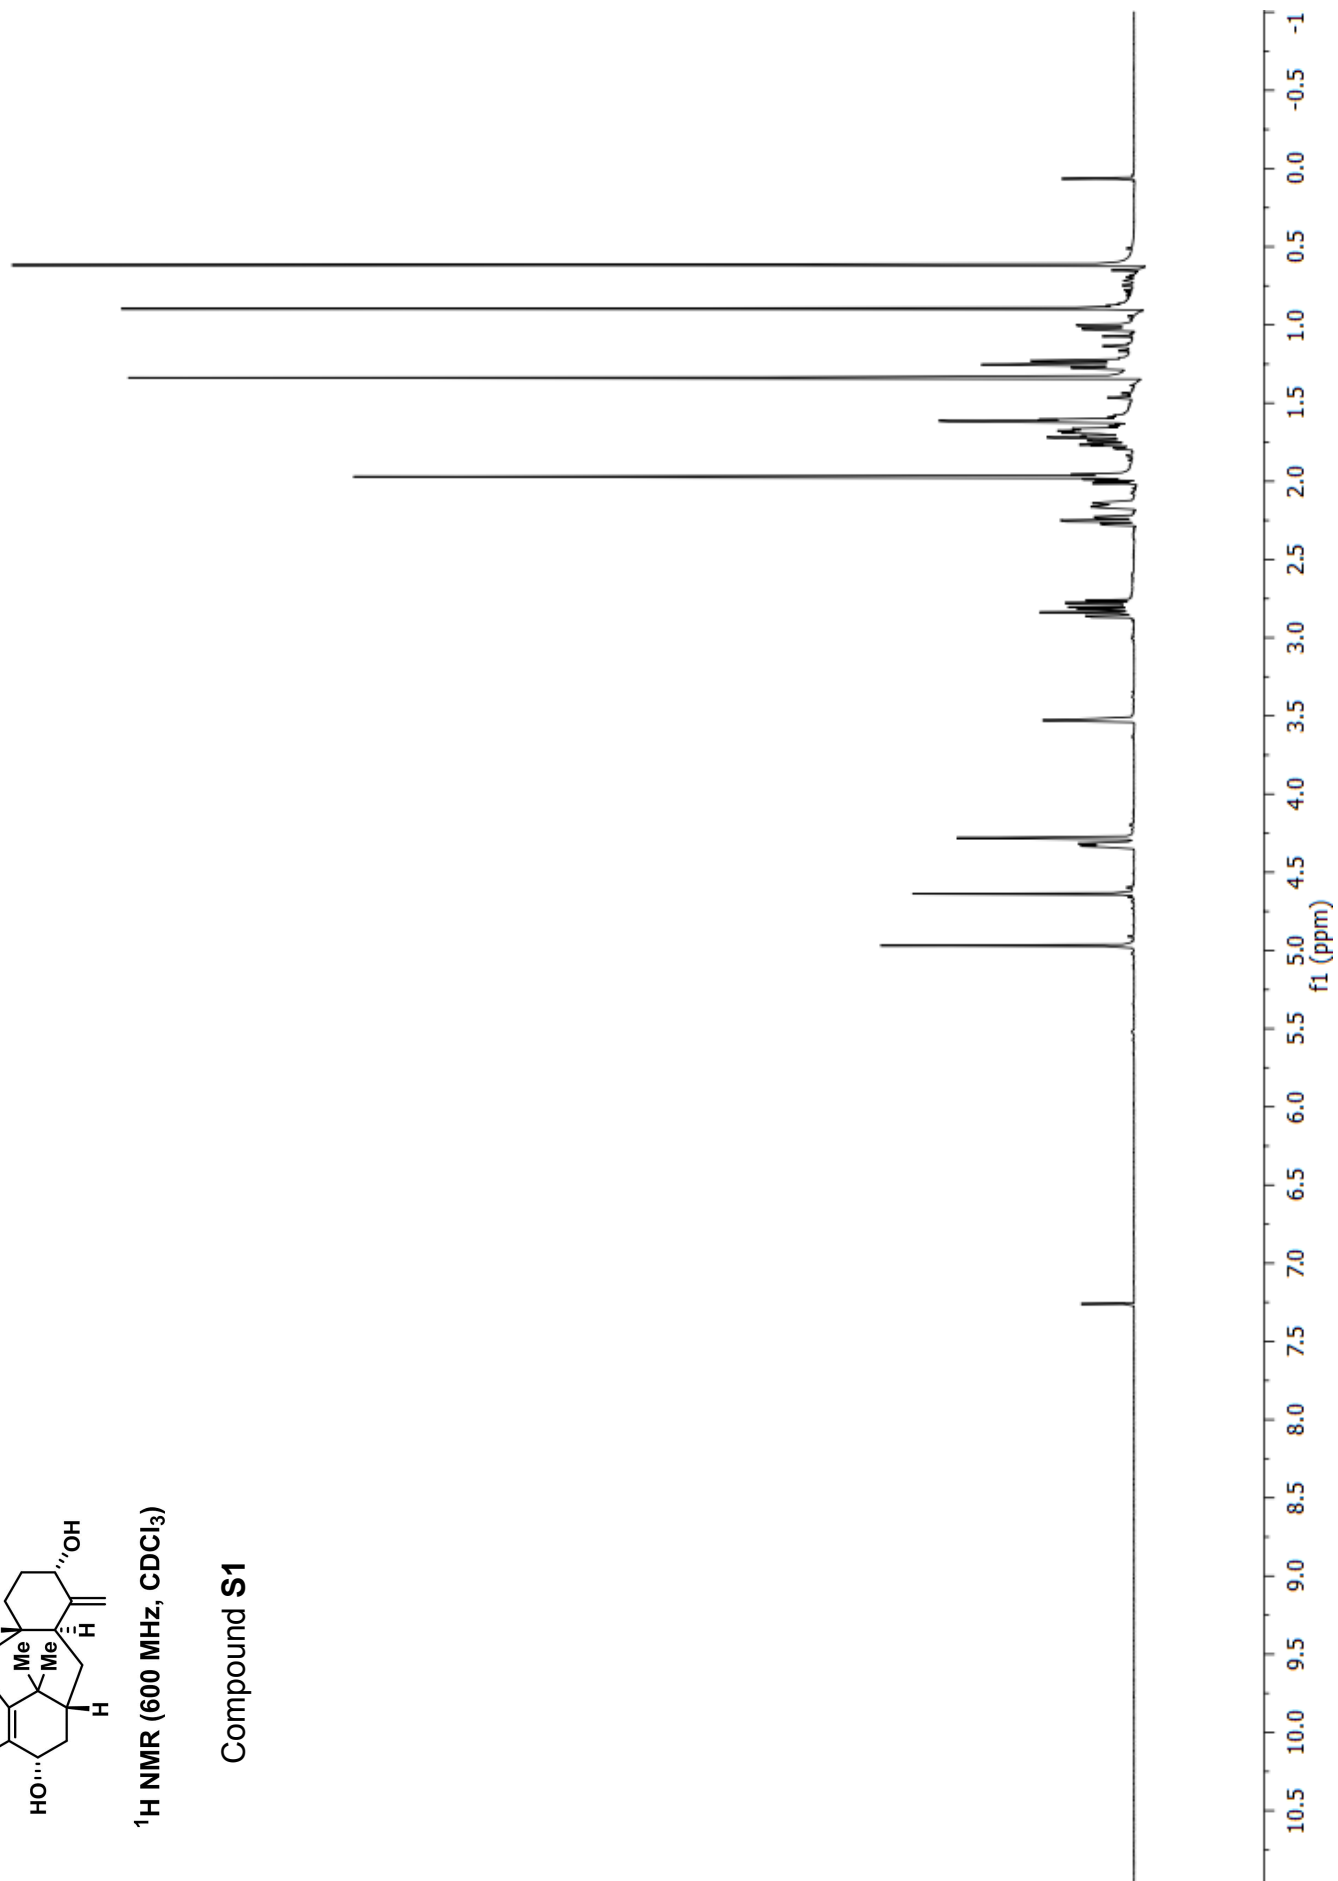

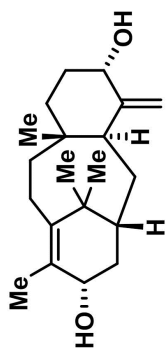

$^{13}\text{C}$  NMR (151 MHz,  $\text{CDCl}_3$ )

Compound S1

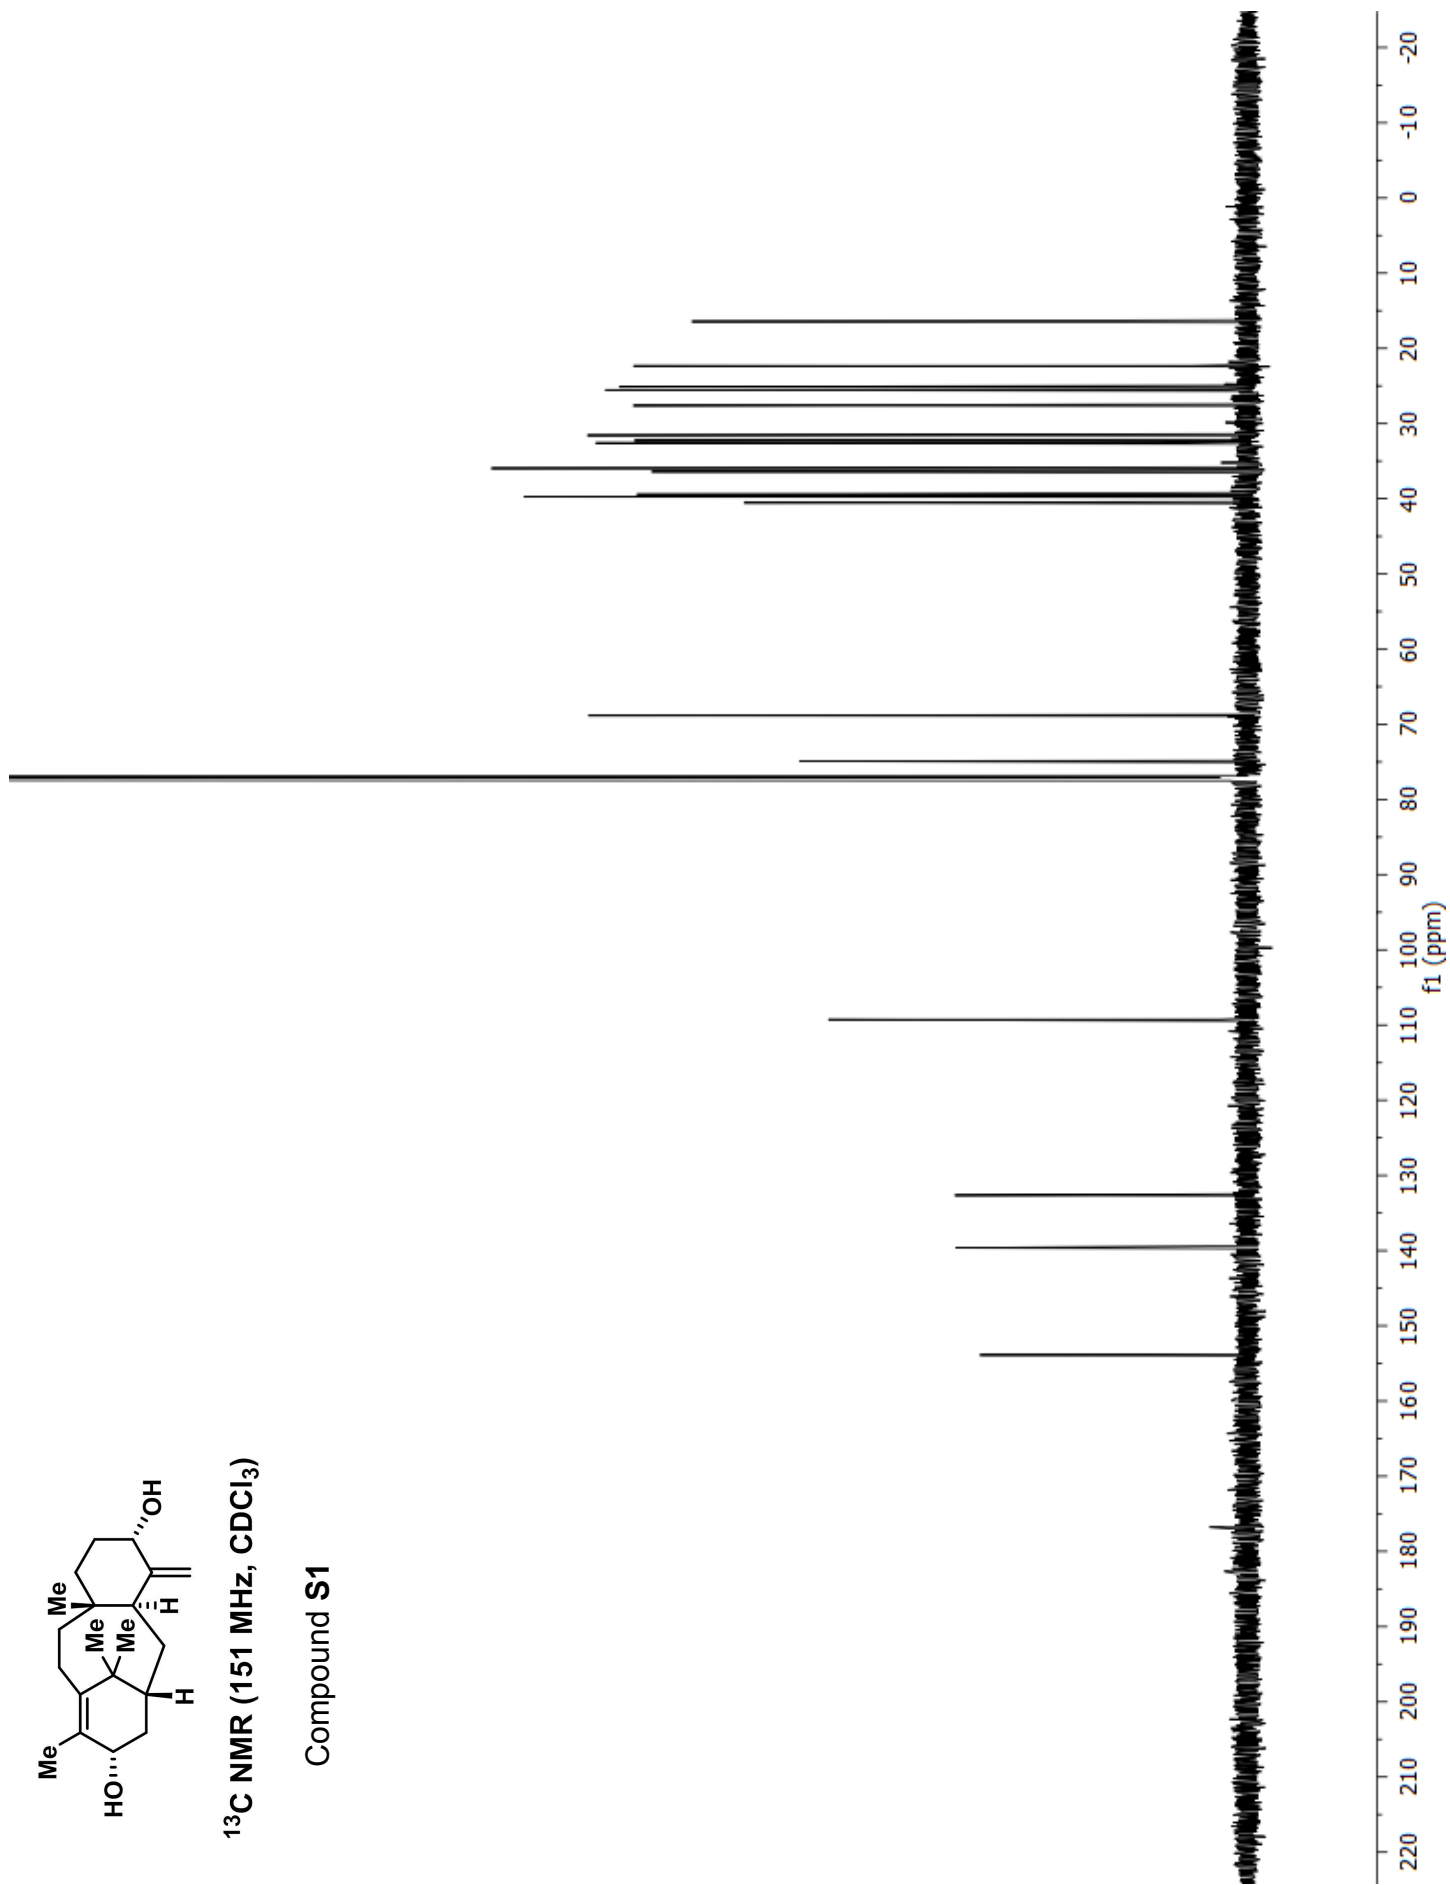

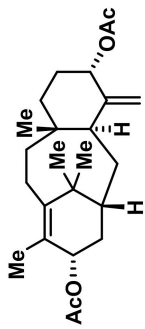

<sup>1</sup>H NMR (600 MHz, CDCl<sub>3</sub>)

Compound **6**

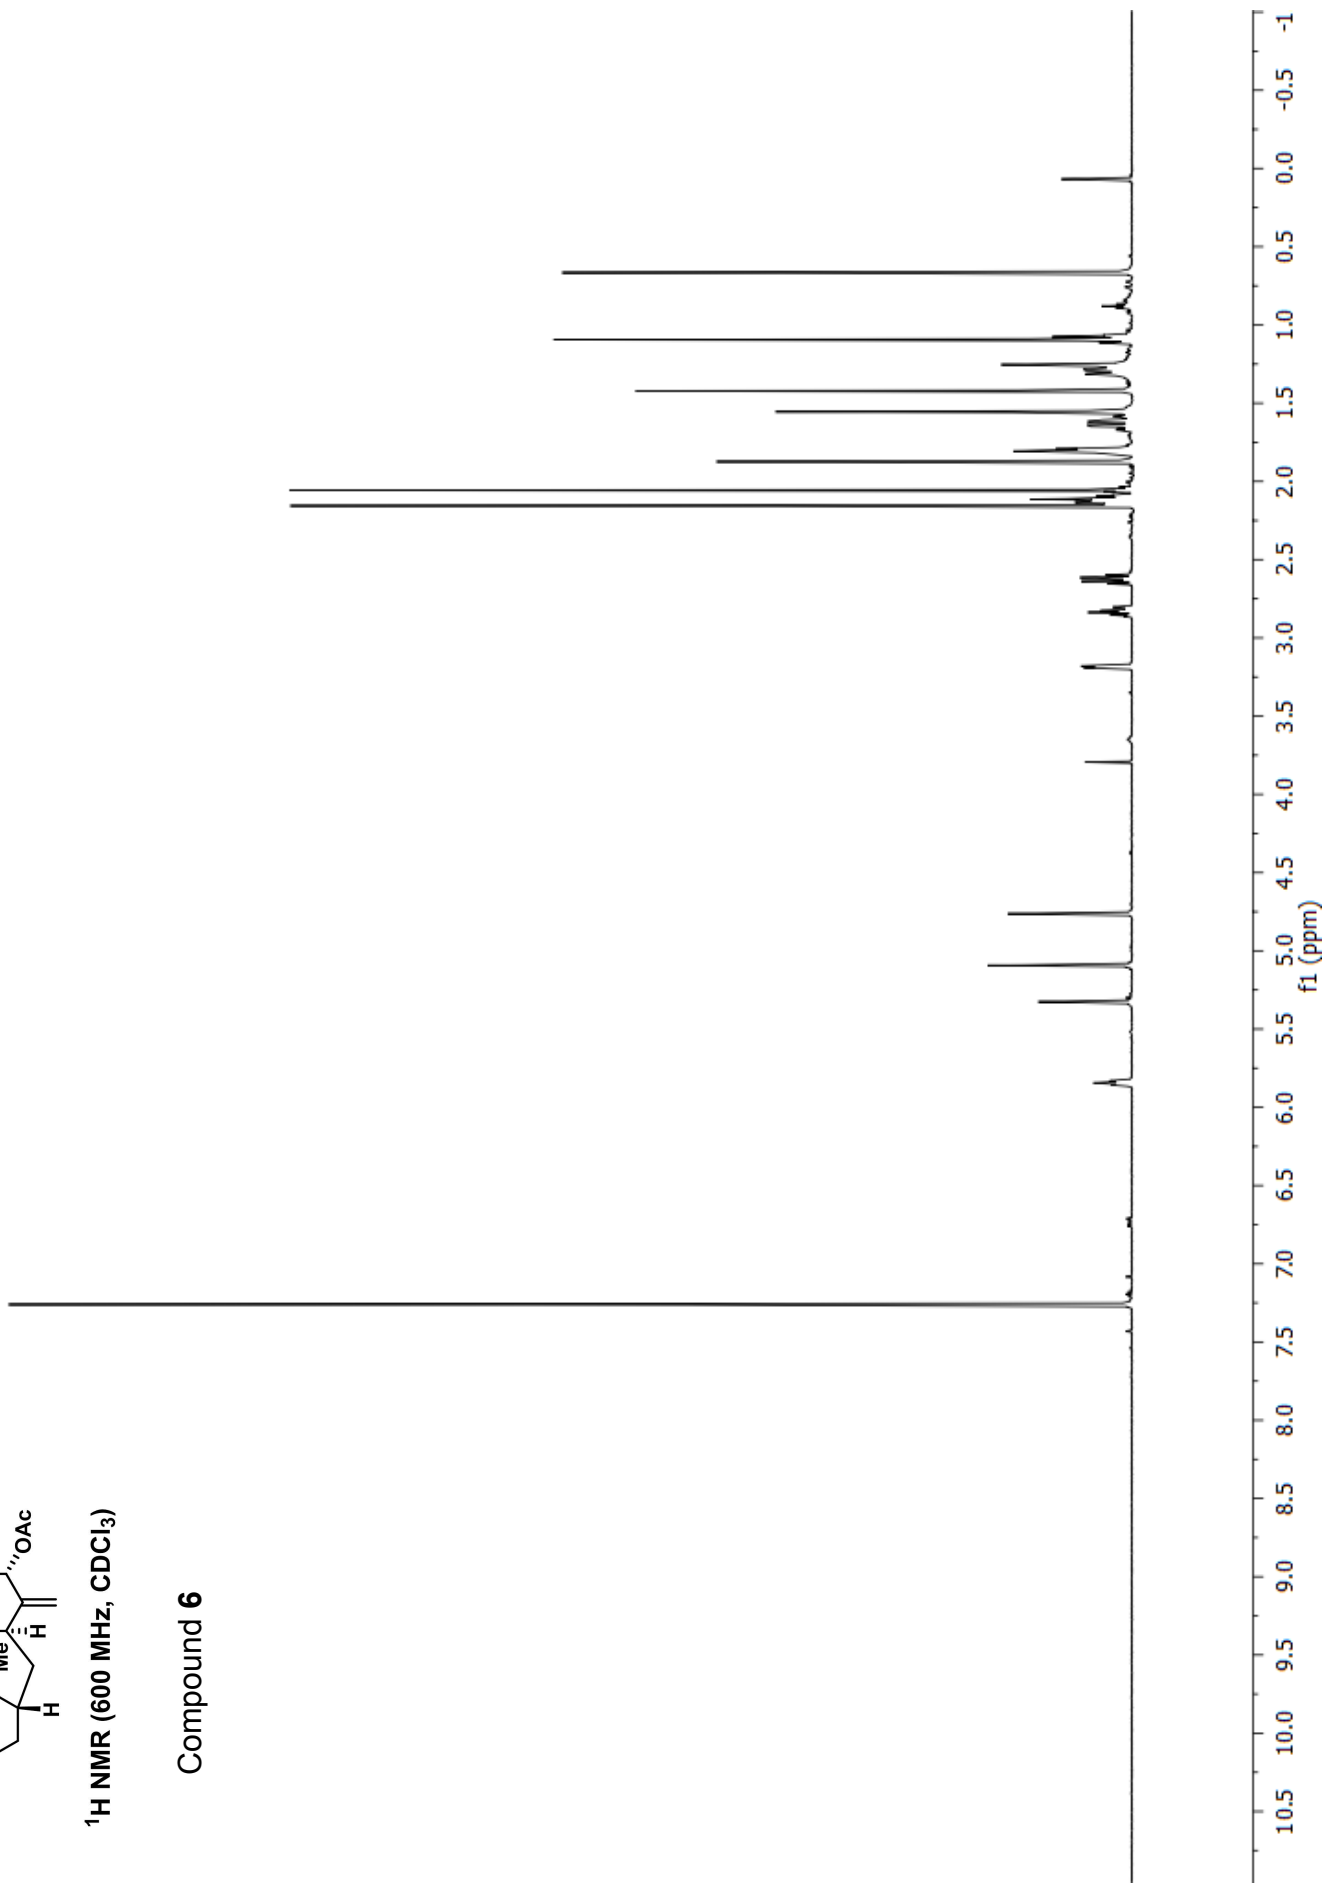

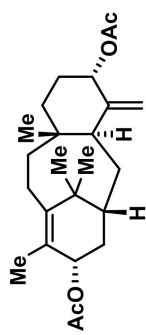

$^{13}\text{C}$  NMR (151 MHz,  $\text{CDCl}_3$ )

Compound **6**

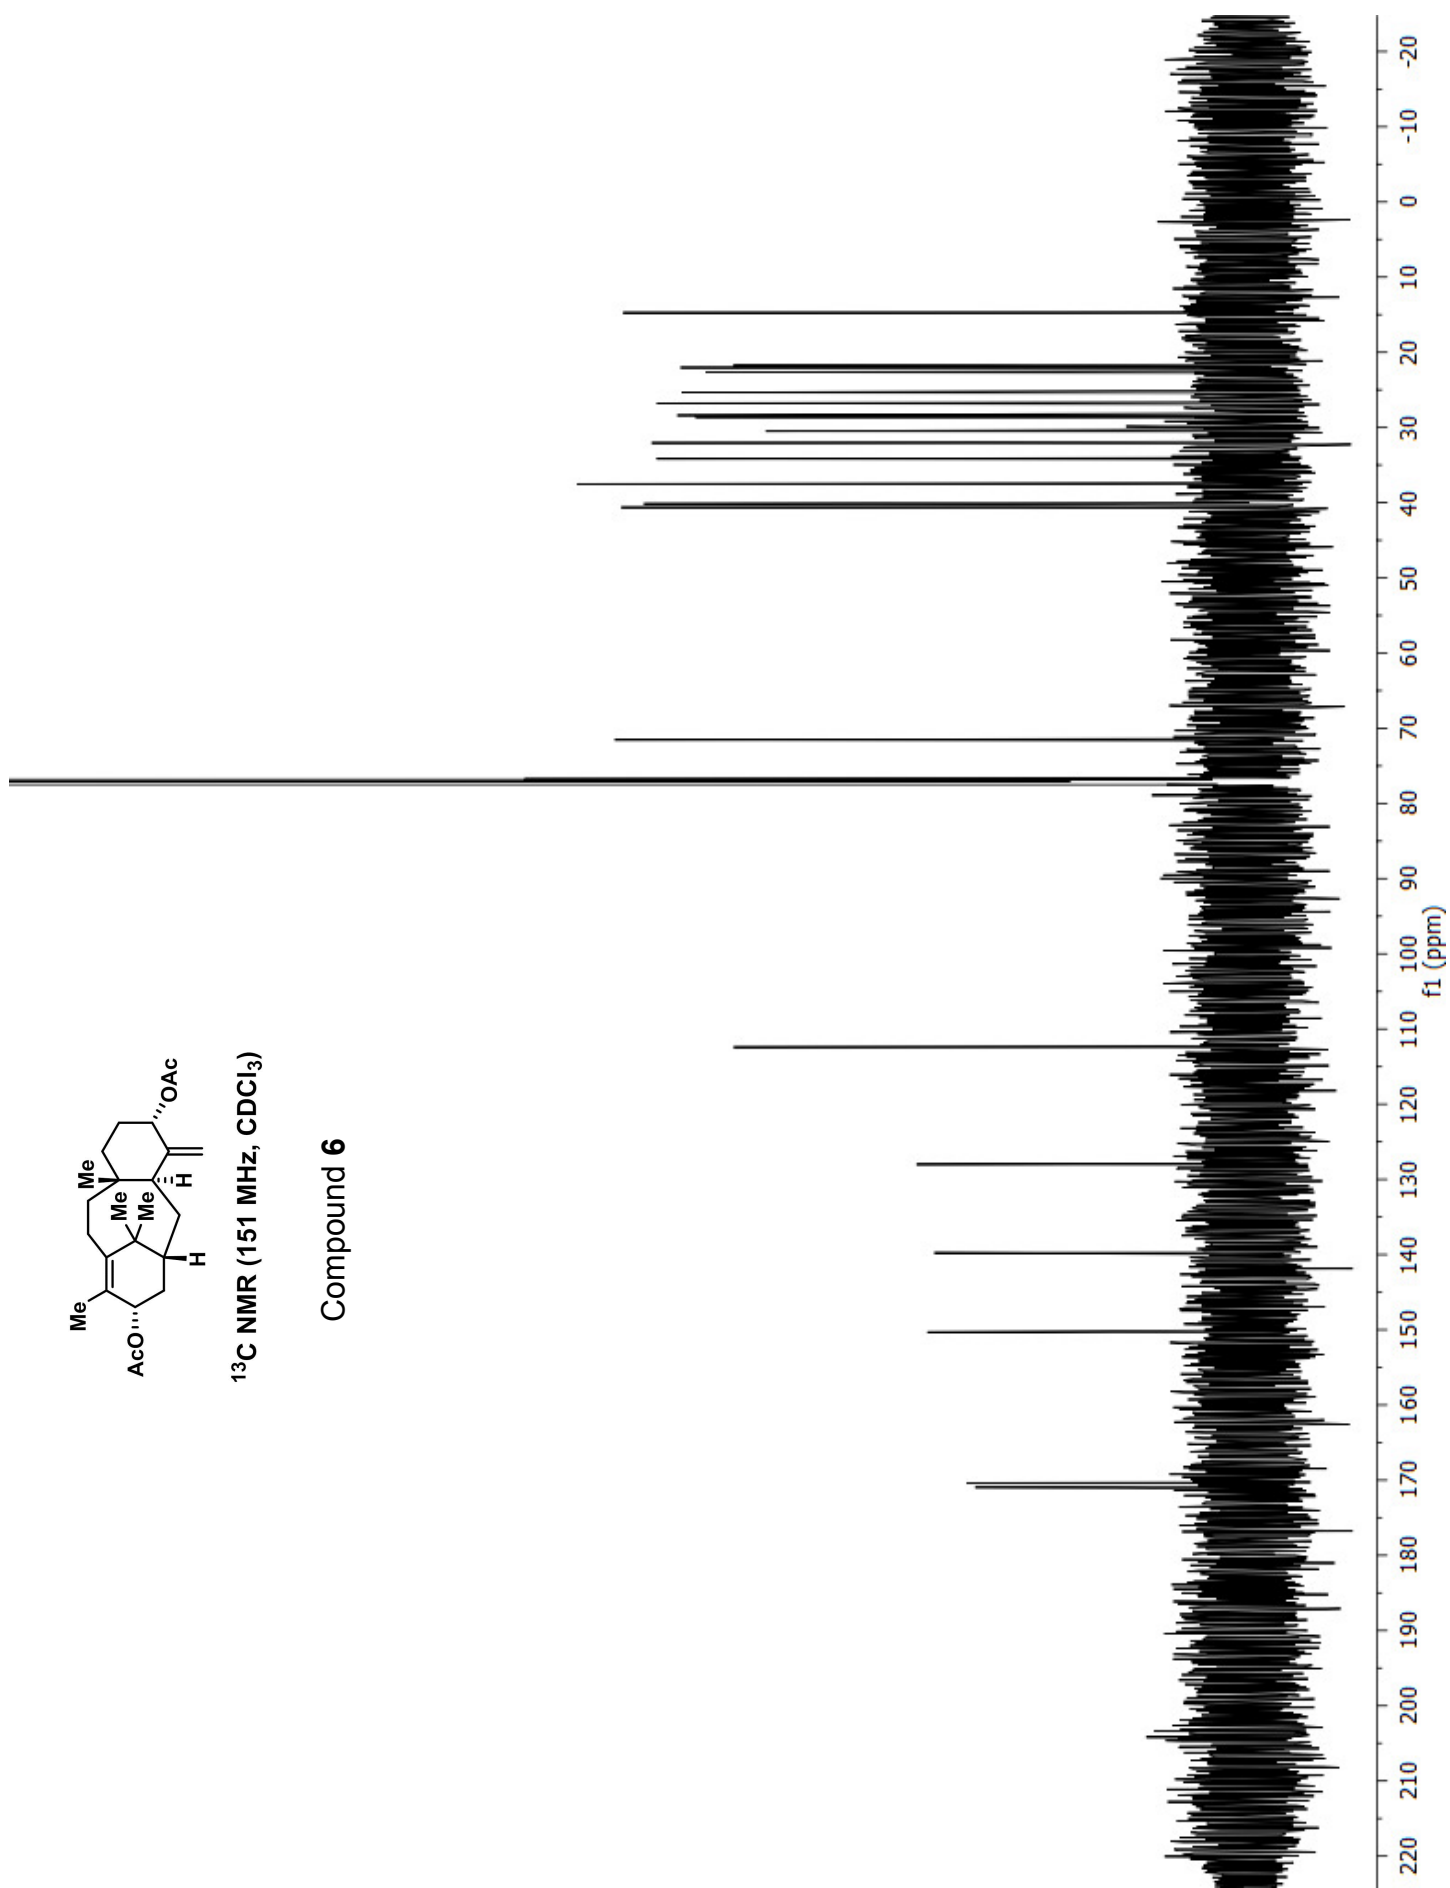



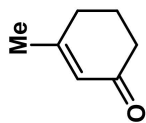

Crude material:  
<sup>1</sup>H NMR (400 MHz, CDCl<sub>3</sub>)

Compound **18**,  
DCM, EtOAc, and  
pyridine  
are present because of  
product volatility.

Compound **18**

No compound **19**

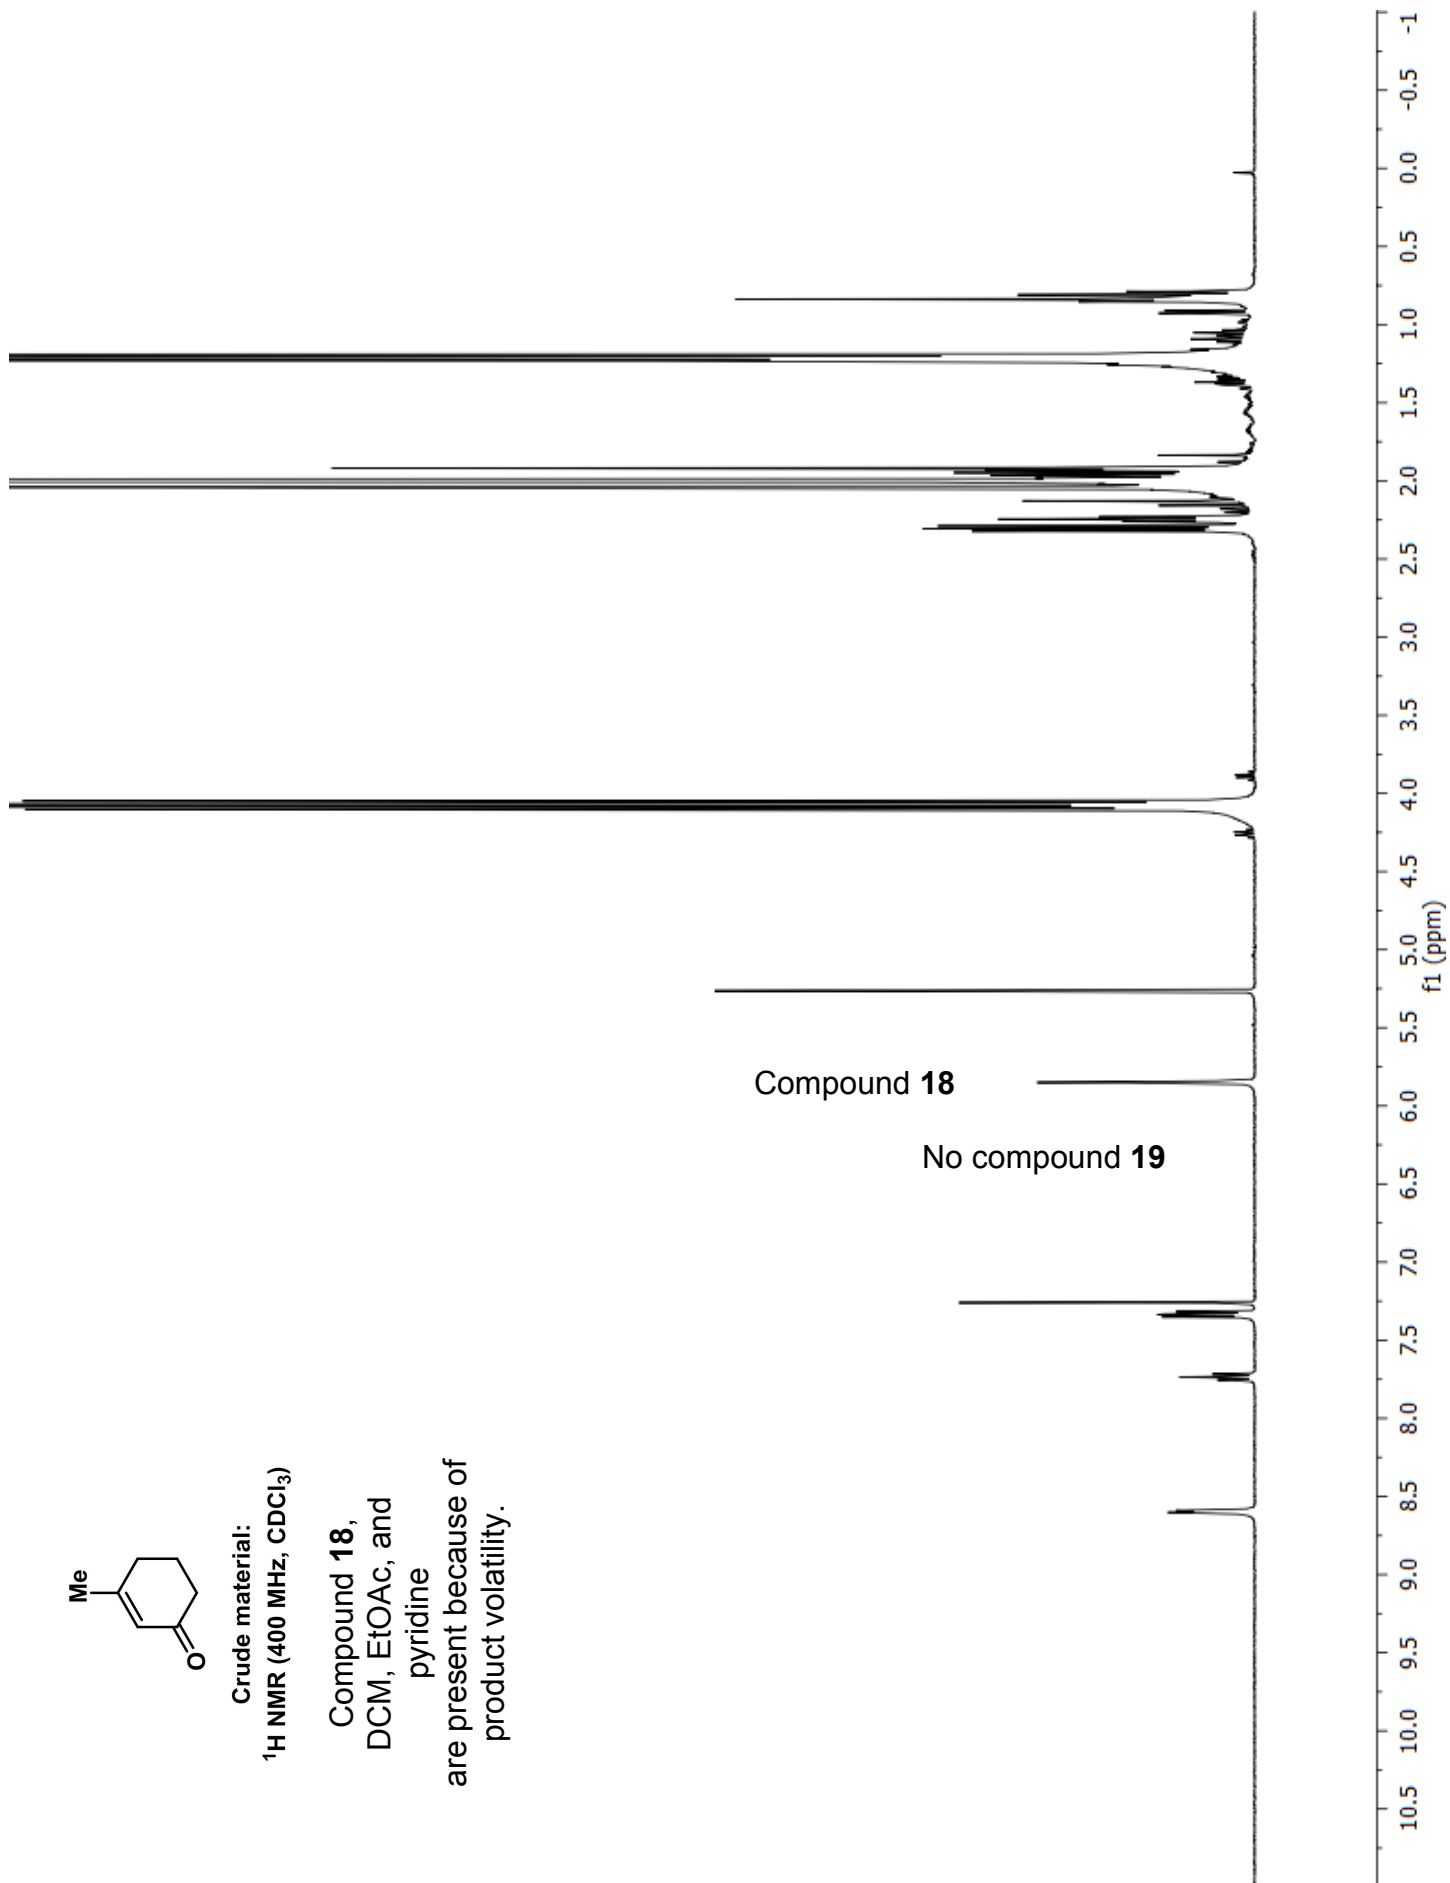

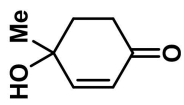

Crude material:  
<sup>1</sup>H NMR (400 MHz, CDCl<sub>3</sub>)

Compound **19**

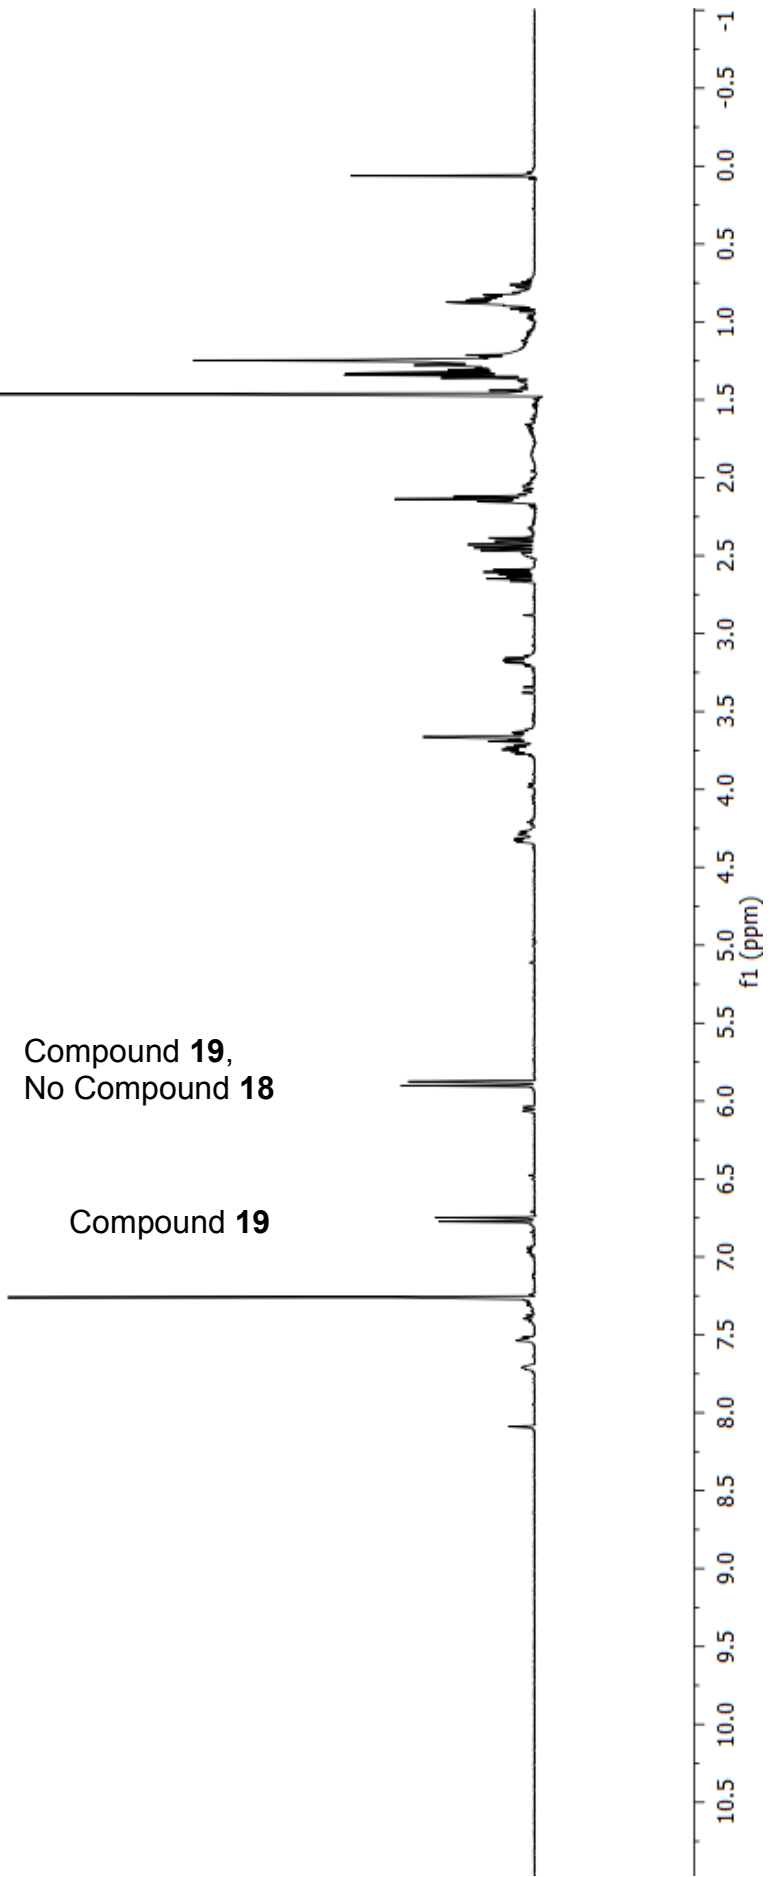

Supplement: ja501782r_si_002.pdf [file ja501782r_si_002.pdf]
